1 **Inhibiting proBDNF to mature BDNF conversion leads to autism-**  
2 **like phenotypes *in vivo***

3  
4 He You<sup>b,i</sup>, Toshiyuki Mizui<sup>a,g</sup>, Kazuyuki Kiyosue<sup>a</sup>, Keizo Takao<sup>c,f,g</sup>, Tsuyoshi Miyakawa<sup>d,g</sup>,  
5 Koichi Kato<sup>a,c</sup>, Mitsuru Otsuka<sup>a,c</sup>, Ting Bai<sup>h</sup>, Kun Xia<sup>h</sup>, Bai Lu<sup>b,i,\*</sup> and Masami Kojima<sup>a,c,g\*</sup>

6  
7 <sup>a</sup> Biomedical Research Institute (BMD), National Institute of Advanced Industrial Science  
8 and Technology (AIST), Osaka 563-8577, Japan

9 <sup>b</sup> School of Pharmaceutical Sciences, Tsinghua University, Beijing, 100084, China

10 <sup>c</sup> Graduate School of Frontier Bioscience, Osaka University, Suita 565-0871, Japan

11 <sup>d</sup> Division of Systems Medical Science, Institute for Comprehensive Medical Science,  
12 Fujita Health University, Toyoake, Aichi, 470-1192, Japan

13 <sup>e</sup> Life Science Research Center, University of Toyama, Toyama, 930-0194, Japan

14 <sup>f</sup> Department of Behavioral Physiology, Graduate School of Innovative Life Science,  
15 University of Toyama, Toyama, 930-0194, Japan

16 <sup>g</sup> Core Research for Evolutional Science and Technology (CREST), Kawaguchi, 332-0012,  
17 Japan

18 <sup>h</sup> Centre for Medical Genetics & Hunan Key Laboratory of Medical Genetics, School of Life  
19 Sciences, Central South University, Changsha, Hunan, China.

20 <sup>i</sup> Advanced Innovation Center for Human Brain Protection, Capital Medical University,  
21 Beijing 100070, China

22  
23 **\*Correspondence should be addressed to M.K. ([m-kojima@aist.go.jp](mailto:m-kojima@aist.go.jp)) and B.L.**  
24 **([bai\\_lu@mail.tsinghua.edu.cn](mailto:bai_lu@mail.tsinghua.edu.cn))**

25  
26  
27 **Keywords:**

28 BDNF, proBDNF, spines, synaptic plasticity, Autism spectrum disorders

29

## 30 **Abstract**

31 **Autism spectrum disorders (ASD) comprise a range of early age-onset**  
32 **neurodevelopment disorders with genetic heterogeneity. Most ASD related genes are**  
33 **involved in synaptic function, which is oppositely regulated by brain-derived**  
34 **neurotrophic factor (BDNF): the precursor proBDNF inhibits while mature BDNF**  
35 **(mBDNF) potentiates synapses. Here we generated a knock-in mouse line (BDNF<sup>met/leu</sup>)**  
36 **in which the conversion of proBDNF to mBDNF is inhibited. Biochemical experiments**  
37 **revealed residual mBDNF but excessive proBDNF in the brain. Similar to other ASD**  
38 **mouse models, the BDNF<sup>met/leu</sup> mice showed decreased brain volumes, reduced dendritic**  
39 **arborization, altered spines, and impaired synaptic transmission and plasticity. They**  
40 **also exhibited ASD-like phenotypes, including stereotypical behaviors, deficits in social**  
41 **interaction, hyperactivity, and elevated stress response. Interestingly, the plasma level of**  
42 **proBDNF, but not mBDNF, was significantly elevated in ASD patients. These results**  
43 **suggest that proBDNF level, but not *Bdnf* gene, is associated with autism-spectrum**  
44 **behaviors, and identify a potential blood marker and therapeutic target for ASD.**  
45

## 46 Introduction

47 Autism spectrum disorders (ASD) are early age-onset neurodevelopment disorders with  
48 genetic and clinical heterogeneity (Folstein & Rutter, 1977). There are three distinctive  
49 behavioral characteristics: social interaction deficits, communication disorders, and repetitive  
50 behaviors (De La Torre-Ubieta, Won, Stein, & Geschwind, 2016). A number of genes related  
51 to synaptic function have been genetically linked to ASD (De Rubeis et al., 2014), including  
52 *fmr1* in Fragile X syndrome (Bassell & Warren, 2008), *mecp2* in Rett syndrome (Amir et al.,  
53 1999), *scn1a* in Dravet's syndrome (Mahoney et al., 2009; Oakley, Kalume, & Catterall,  
54 2011), and *cacna1* in Timothy syndrome (Splawski et al., 2004). Animal models with  
55 mutations of these genes display repetitive stereotypes, and deficits in social interaction  
56 similar to ASD patients (De La Torre-Ubieta et al., 2016). Interestingly, nearly all ASD  
57 animal models exhibit synaptic deficits, such as alterations in synaptic density, synaptic  
58 protein synthesis, and synaptic plasticity (De La Torre-Ubieta et al., 2016; Mullins, Fishell, &  
59 Tsien, 2016).

60  
61 A key regulator for synaptic function is brain-derived neurotrophic factor (BDNF) (Barde,  
62 1994; Ceni, Unsain, Zeinieh, & Barker, 2014; Greenberg, Xu, Lu, & Hempstead, 2009;  
63 Kaplan & Miller, 2007), a secretory protein best known for its roles in neuronal survival and  
64 differentiation during development, and synaptic function in the adult (Bibel & Barde, 2000;  
65 Park & Poo, 2013; Reichardt, 2006). Most of the ASD-related synaptic genes are up- or  
66 downstream of BDNF (Lu, Nagappan, Guan, Nathan, & Wren, 2013), although genetic  
67 studies have so far not provided a direct link between BDNF and ASD (De La Torre-Ubieta et  
68 al., 2016; De Rubeis et al., 2014; Miles, 2011). BDNF is initially synthesized as a precursor  
69 protein (proBDNF), which is proteolytic cleaved either intracellularly by furin and pro-  
70 protein convertases or extracellularly by plasmin and matrix metalloproteases (MMPs) to  
71 form mature BDNF (mBDNF) (Chao & Bothwell, 2002; Lee, Kermani, Teng, & Hempstead,  
72 2001; Lu, Pang, & Woo, 2005b; Mowla et al., 2001; P. T. Pang et al., 2004; Woo et al., 2005).

73  
74 A number of cell biological and physiological studies implicated that proBDNF is a secreted  
75 protein (Keifer, Sabirzhanov, Zheng, Li, & Clark, 2009; Nagappan et al., 2009; Woo et al.,  
76 2005; J. Yang et al., 2009). More importantly, proBDNF is not simply an inactive precursor,  
77 but an active protein that elicits biological functions through its own receptor (Lu et al.,  
78 2005b). There is good evidence that extracellular cleavage of proBDNF plays an important  
79 role in late phase long-term potentiation (LTP) and activity-dependent synaptic competition  
80 (Je et al., 2012; Je et al., 2013; Petti T. Pang, Nagappan, Guo, & Lu, 2016; P. T. Pang et al.,  
81 2004; F. Yang et al., 2009). Previous *in vitro* studies showed that proBDNF promotes the  
82 apoptosis of sympathetic neurons and cerebellar granule neurons, reduces the neurite  
83 outgrowth of basal forebrain cholinergic neurons (Teng et al., 2005; Volosin et al., 2006) and  
84 induces the retraction of dendritic spines of hippocampal neurons (H. Koshimizu et al.,  
85 2009). It has also been shown that proBDNF enhances long-term depression (LTD) in  
86 hippocampal slices (Liu et al., 2004; Massey et al., 2004; Rosch, Schweigreiter, Bonhoeffer,

87 Barde, & Korte, 2005; Woo et al., 2005) These studies suggest that proBDNF, when secreted  
88 extracellularly, could elicit biological effects very different from and even opposite to  
89 mBDNF. Moreover, these apparently inhibitory effects are mediated by the pan-neurotrophin  
90 receptor p75<sup>NTR</sup>, but not by the high affinity BDNF receptor TrkB (H. Koshimizu et al., 2009;  
91 Teng et al., 2005; Volosin et al., 2006). Binding of proBDNF to the complex comprising  
92 p75<sup>NTR</sup> and sortilin-related VPS10 domain containing receptor 2 (SorCS2) was shown to  
93 induce growth cone retraction by initiating the dissociation of the guanine nucleotide  
94 exchange factor Trio from the receptor complex (Deinhardt et al., 2011). Taken together,  
95 these *in vitro* studies have led to the “Yin-Yang” hypothesis that (i) BDNF and proBDNF  
96 elicit opposing biological functions and (ii) the conversion of proBDNF to mBDNF, or the  
97 ratio of proBDNF and mBDNF may determine the functional outcomes (Lu et al., 2005b).

98  
99 A number of key questions remain: what is the physiological role of proBDNF? How  
100 important is the cleavage of proBDNF? A cleavage-resistant proBDNF knock-in mouse line  
101 was developed by mutating the two key arginine residues (Figure 1A, 127R and 128R) at the  
102 cleavage site of proBDNF (Yang et al., 2014). The homozygous mice were not viable,  
103 possibly due to a complete lack of mBDNF, in addition to the strong apoptotic effects of  
104 dramatically elevated levels of un-cleavable proBDNF in the brain. The heterozygous  
105 (*probdnf-HA/+*) mice, which have one copy of un-cleavable proBDNF, displayed a reduced  
106 dendritic complexity and impaired LTP similar to BDNF heterozygous mutant (BDNF<sup>+/-</sup>)  
107 (Yang et al., 2014). In addition, the *probdnf-HA/+* showed a reduced spine density, a  
108 decreased basal synaptic transmission, and an elevated LTD, which were not observed in  
109 BDNF<sup>+/-</sup> mice (Woo et al., 2005). Because the *probdnf-HA/+* mice expressed a high level of  
110 un-cleavable proBDNF but its mBDNF level was reduced by half, it is unclear whether the  
111 phenotypes observed were due to an increase in proBDNF or a decrease in mBDNF, or both.  
112 Moreover, the behaviors of the the *probdnf-HA/+* were not examined.

113  
114 In the present study, we generated a proBDNF knock-in mouse line named BDNF<sup>met/leu</sup>, in  
115 which the arginine residues R125 and R127 at the cleavage site were converted to methionine  
116 (R125M) and leucine (R127L) (rs1048220 and rs1048221, respectively), based on previously  
117 reported human SNPs (H. Koshimizu et al., 2009). *In vitro* biochemical experiments  
118 demonstrated that these two mutations, either alone or together, markedly inhibit the cleavage  
119 of proBDNF (M. Koshimizu et al., 2015). The BDNF<sup>met/leu</sup> mice expressed high levels of  
120 proBDNF but low levels of mBDNF, compared with their wild type (WT) littermates (H.  
121 Koshimizu et al., 2009). Unlike the homozygotes of proBDNF knock-in mice (*probdnf-*  
122 *HA/HA*) which died at birth, the homozygous BDNF<sup>met/leu</sup> mice survived until adulthood  
123 (Kojima et al., 2020). This allowed us to perform detailed characterization of the adult  
124 BDNF<sup>met/leu</sup> mice. Unexpectedly, this new line of mutant mice exhibited many morphological,  
125 physiological, and behavioral phenotypes often seen in ASD patients. Further, preliminary  
126 characterization of ASD patients revealed a significant increase in the plasma level of  
127 proBDNF. Our results point to a possible non-genetic mechanism of ASD and suggest a  
128 blood marker potentially useful in the clinic.

## 129 Results

### 130 Generation of BDNF<sup>met/leu</sup> mice predominantly expressing proBDNF

131 We generated a knock-in mouse line in which the endogenous *Bdnf* allele was replaced with  
132 proBDNF containing human SNPs that changed two arginines proximal to the cleavage site  
133 to methionine (R125M) and leucine (R127L), respectively (Figure 1A). We previously  
134 reported that these amino acid changes led to inefficient conversion of proBDNF to mature  
135 BDNF in cultured neurons (H. Koshimizu et al., 2009). Immunoblot analyses using a  
136 polyclonal BDNF antibody (N-20, Santa Cruz) demonstrated that hippocampal lysates from  
137 8-week-old homozygous mutant (BDNF<sup>met/leu</sup>) mice contained an excess amount of proBDNF  
138 and only a residual amount of mBDNF, whereas those from wild-type (WT) littermates (or  
139 BDNF<sup>+/+</sup>) contained more mBDNF than proBDNF (Figure 1B). This opposite ratio of  
140 mBDNF and proBDNF was quantitatively confirmed by Western blot analysis using a  
141 monoclonal anti-pan-BDNF antibody (clone; 3C11, Icosagen) (Kojima et al., 2020) (Figure  
142 1C). A band with the same size as proBDNF was also observed via immunoblotting using  
143 another previously-generated proBDNF-specific antibody (Nagappan et al., 2009), further  
144 validating that this was indeed proBDNF (Figure 1D). Taken together, we generated a  
145 proBDNF knock-in mouse line that expresses a high level of proBDNF with a residual  
146 amount of mBDNF.

147

148 Despite insufficiency in the proBDNF cleavage, the BDNF<sup>met/leu</sup> homozygous mice were born  
149 in a Mendelian manner, and approximately 95% of the homozygous mutant mice survived to  
150 adulthood (Kojima et al., 2020). We therefore performed all subsequent experiments using  
151 BDNF<sup>met/leu</sup> homozygous, but not heterozygous, mice. The survival of the BDNF<sup>met/leu</sup> mice to  
152 adulthood was unexpected because the homozygous proBDNF knock-in mice with different  
153 mutations at the proBDNF cleavage site (RVRR→RVAA) died shortly after birth, as reported  
154 previously (Yang et al., 2014). Unlike the proBDNF knock-in mice, the morphology and  
155 TrkB activation of the hearts of BDNF<sup>met/leu</sup> mice were normal (Kojima et al., 2020). These  
156 morphological and immunohistochemical results suggest that the inefficient conversion of  
157 proBDNF into mBDNF due to R125M/ R127L mutation may not influence the survival of  
158 animals and/or development of the heart.

159

### 160 Brain volumes and dendritic complexity in BDNF<sup>met/leu</sup> mice

161 The brains of the BDNF<sup>met/leu</sup> mice were smaller than their WT counterparts (Figure 2A). The  
162 mean wet weight of the BDNF<sup>met/leu</sup> brains was  $15.1 \pm 1.3\%$  lower than that of the BDNF<sup>+/+</sup>  
163 brains (Figure 2B). Cavalieri analysis of Nissl-stained sections revealed that the whole brain  
164 volume of the BDNF<sup>met/leu</sup> group was  $17.7 \pm 1.56\%$  lower than that of the BDNF<sup>+/+</sup> group  
165 (Figure 2C). Similarly, the volume of the BDNF<sup>met/leu</sup> hippocampus and cortex was reduced  
166 by  $14.0 \pm 2.3\%$  and  $15.8 \pm 1.5\%$ , whereas the reduction in olfactory bulb was not significant,  
167 compared with the BDNF<sup>+/+</sup> group (Figure 2C). Thus, inefficient cleavage of proBDNF  
168 affects the volume of the adult brain, particularly in the hippocampus and cerebral cortex, two  
169 areas known to express high levels of BDNF mRNA (Timmusk et al., 1993).

170

171 Since proBDNF is highly expressed in dentate gyrus (DG) (Zhou et al., 2004) the dendritic  
172 complexity of the DG neurons was analyzed using Golgi staining. The BDNF<sup>met/leu</sup>  
173 homozygous mice had a marked decrease in dendritic arbor complexity compared with their  
174 BDNF<sup>+/+</sup> littermates (Figure 2D, left panel). The difference became evident at 70  $\mu$ m from  
175 cell body (Figure 2D, right panel). Nevertheless, there was no significant difference between  
176 the diameters of the cell bodies in the BDNF<sup>met/leu</sup> and WT animals (data not shown). No  
177 apparent apoptotic cells were detected in the DG regions of brains from each group (Figure  
178 2E). Thus, inhibition of proBDNF cleavage may lead to impairment of dendritic complexity  
179 but not neuronal survival at least in hippocampal DG region in animals.

180

181 The reduction in brain volume was also reported in mouse models with autism-like  
182 phenotypes (De La Torre-Ubieta et al., 2016), such as Nlgn3 KO (Baudouin et al., 2012),  
183 Nlgn4 KO (Jamain et al., 2008) and ARX cKO mice (Fulp et al., 2008). Furthermore, reduced  
184 dendritic complexity was observed in models with changes in the expression of ASD related  
185 proteins, such as decreased TAO2 (de Anda et al., 2012) or elevated UBE3A (Khatiri et al.,  
186 2018). Thus, the BDNF<sup>met/leu</sup> mice manifest morphological changes similar to other ASD  
187 models.

188

### 189 **Dendritic spine changes in BDNF<sup>met/leu</sup> mice**

190 Next, we performed a detailed analysis of the dendritic spine morphologies and density in  
191 BDNF<sup>met/leu</sup> hippocampus. The maximal length, maximum width, and density of spine  
192 protrusions in the secondary dendritic segments of hippocampal pyramidal neurons in the  
193 stratum radiatum of the CA1 area were determined (Figure 3A). We found no significant  
194 difference in the mean protrusion lengths between the BDNF<sup>met/leu</sup> and WT groups ( $P = 0.25$ )  
195 (Figure 3B). However, the mean protrusion width of the BDNF<sup>met/leu</sup> mice was significantly  
196 smaller than that of the WT mice (Figure 3C).

197

198 A previous report using heterozygous *probdnf-HA/+* mice showed a marked decrease in total  
199 spine density, without detailed classification of different types of spines (Yang et al., 2014). It  
200 was also unclear whether the decrease in spine density was due to an increase in proBDNF or  
201 a decrease in mBDNF. In contrast, we observed a significant increase in total spine density  
202 (Figure 3D). According to previous studies, the spine protrusions could be classified as thin (a  
203 protrusion with length to width ratio  $>2$ ) or mushroom-like ones (Bourne & Harris, 2008;  
204 Harris, Jensen, & Tsao, 1992; Matsuzaki et al., 2001). Detailed quantitative analyses of CA1  
205 neuron dendrites revealed a small but significant decrease in mushroom-like spines (Figure  
206 3E), but a more than 2-fold increase in thin spines (Figure 3F), in the BDNF<sup>met/leu</sup> mice. These  
207 results reveal that our BDNF<sup>met/leu</sup> mice are distinct from the previously reported *probdnf-*  
208 *HA/+* mice and suggest that the prevention of proBDNF cleavage results in instability of  
209 dendritic spines in hippocampus. Selective increase in the density of thin spines (or filopodia)  
210 has been observed in *Fmr1* KO mice (de Vrij et al., 2008), a mouse model for Fragile X  
211 Syndrome (Bernardet & Crusio, 2006; Gross et al., 2015; Huber, Gallagher, Warren, & Bear,



212 2002; Lim et al., 2014). Selective decrease in the density of mushroom-like dendritic spines  
213 has been reported in Tg1 mice that over-express human MeCP2, a mouse model for Rett  
214 syndrome.

215

### 216 **Altered postsynaptic scaffold**

217 Recent studies suggest that some of the biological effects of proBDNF require its interaction  
218 with p75<sup>NTR</sup> and the sortilin family proteins such as SorCS2 and SorCS3 (Glerup et al.,  
219 2016). SorCS3 is expressed at a high level in the hippocampal CA1 region and is localized to  
220 the postsynaptic density (PSD), and the loss of SorCS3 in mice leads to the impairment of  
221 hippocampal LTD (Breiderhoff et al., 2013). We therefore investigated whether the proBDNF  
222 signaling machinery is intact in the BDNF<sup>met/leu</sup> hippocampus. We found that the expression  
223 levels of p75<sup>NTR</sup>, SorCS2, and SorCS3 in the hippocampus were not affected by the  
224 BDNF<sup>met/leu</sup> mutation (Figure 3-supplement 1). Thus, proBDNF signaling through the p75<sup>NTR</sup>-  
225 SorCS2 and/or SorCS3 receptor complex occurs normally in the BDNF<sup>met/leu</sup> mice.

226

227 The deficits in postsynaptic scaffold proteins have been reported in several ASD mouse  
228 models (Mullins et al., 2016; Peça et al., 2011). Two proteins have been implicated in spine  
229 structure/function: PSD-95, a postsynaptic scaffold protein abundant in spines, and SynGAP,  
230 a Ras GTPase-activating protein known to regulate spine morphology (Kim, Liao, Lau, &  
231 Haganir, 1998; Vazquez, Chen, Sokolova, Knuesel, & Kennedy, 2004). The expression levels  
232 of PSD-95 and SynGAP were not affected by the BDNF<sup>met/leu</sup> mutation (Figure 3G).  
233 However, immunoprecipitation studies revealed that the interaction of PSD-95 and SynGAP  
234 was attenuated markedly in the lysates prepared from 9-week-old BDNF<sup>met/leu</sup> mice,  
235 compared with the WT control (Figure 3H).

236

237 proBDNF has been shown to promote hippocampal LTD by regulating the expression of the  
238 GluN2B subunit of the N-methyl-D-aspartate receptor (NMDAR)(Woo et al., 2005). The  
239 expression of hippocampal GluN2B were comparable between WT and BDNF<sup>met/leu</sup> animals  
240 (Figure 3I). Interestingly, the level of GluN2B was significantly higher in the crude  
241 synaptosomal fraction (P2) prepared from BDNF<sup>met/leu</sup> hippocampi (Figure 3J and K). In  
242 contrast, its interaction with PSD-95 was slightly decreased (Figure 3L). However, the levels  
243 of PSD-95, synapsin I, or beta-actin in the same P2 fraction were not altered (Figure 3J and  
244 K). Overall, these data suggest that proBDNF signaling *in vivo* leads to a down-regulation of  
245 the molecular interaction of scaffolding proteins in dendritic spines but an up-regulation of  
246 GluN2B expression at extrasynaptic sites in the hippocampal neurons. These findings are  
247 reminiscent to the impairments in NMDA receptor function observed in the Shank3 mutant  
248 (Duffney et al., 2015) and Shank2 exons 6-7 KO mice (Won et al., 2012), which are also used  
249 as ASD models..

250

### 251 **Impaired synaptic transmission and plasticity**

252 We further examined whether deficits in dendritic spines would alter synaptic function in  
253 Schaffer collateral-CA1 pyramidal neurons (Mizui et al., 2015). The slope of the input/output

254 (I/O) curve was significantly reduced, suggesting an impairment in basal synaptic function in  
255 BDNF<sup>met/leu</sup> synapses (Figure 4A). However, paired-pulse facilitation (PPF) was not altered in  
256 CA1 synapses of the BDNF<sup>met/leu</sup> mice, indicating normal presynaptic function (Figure 4B).  
257 The decrease in mushroom spines but normal PPF suggest that the reduction in basal synaptic  
258 transmission could be mediated by post-synaptic rather than pre-synaptic mechanisms.

259

260 We next examined long-term synaptic plasticity in BDNF<sup>met/leu</sup> mice. Previous studies have  
261 shown that the application of exogenous proBDNF enhanced LTD in juvenile (5-week-old)  
262 hippocampal slices (Woo et al., 2005). LTD was elevated in 3-week-old hippocampal slices  
263 from the previously reported in the heterozygous *probdnf-HA/+* mice, which have half of its  
264 mBDNF but elevated proBDNF (Yang et al., 2014). We tested LTD in hippocampal slices  
265 from 3-week-old BDNF<sup>met/leu</sup> mice which predominantly express proBDNF with residual  
266 mBDNF (Figure 1C). The Low-frequency stimulation (LFS; 1 Hz, 900 pulses, 15 min) was  
267 applied to Schaffer collaterals of hippocampal slices. In marked contrast to what was  
268 observed in *probdnf-HA/+* mice, both induction and expression of LTD was severely  
269 impaired in BDNF<sup>met/leu</sup> mice (Figure 4D). We further examined whether hippocampal LTP  
270 was altered in BDNF<sup>met/leu</sup> mice. Two-month-old hippocampal slices were used, field EPSP  
271 slopes at CA1 synapses were recorded, and high-frequency stimulation (HFS, 100Hz, 1  
272 second) was applied. Although control mice expressed normal LTP (Figure 4C), the  
273 BDNF<sup>met/leu</sup> mice failed to express LTP (Figure 4C). Taken together, it appears that  
274 BDNF<sup>met/leu</sup> mice, similar to most ASD models (De La Torre-Ubieta et al., 2016), exhibit  
275 deficits in all aspects of synaptic functions, including synaptic transmission and plasticity. For  
276 example, the Shank2 exons 6–7 KO mice showed impairment in both LTD and LTP (Won et  
277 al., 2012).

278

### 279 **Stereotypes and deficits in social interactions**

280 Reduced brain volume, decreased dendritic complexity, increased thin spines, as well as  
281 deficits in postsynaptic scaffold proteins and synaptic functions are all characteristics of  
282 mouse models of ASD. In humans, ASD is a group of developmental brain disorders with  
283 several distinctive features, including reduced social interactions, language problems, and  
284 repetitive and restrictive behaviors (De La Torre-Ubieta et al., 2016; Mullins et al., 2016).  
285 While it is difficult to investigate language problems in animals, several mouse ASD models  
286 display common autistic behaviors such as hyperactivity, repetitive and stereotyped  
287 behaviors, and anxiety (De La Torre-Ubieta et al., 2016). We therefore investigate whether  
288 BDNF<sup>met/leu</sup> mice have some of the ASD-related behavioral phenotypes.

289

290 An obvious repetitive and stereotypical behavior seen in the BDNF<sup>met/leu</sup> mice was  
291 “stargazing.” In home cages, BDNF<sup>met/leu</sup> mice displayed repeated head-tossing very similar  
292 to that seen in the classic “stargazer” mouse (Figure 5A, Movie#1) (L. Chen et al., 2000).  
293 Quantitative analyses showed that the mutant mice underwent stargazing over 50 times per  
294 min (Figure 5B). Such behavior was hardly seen in WT mice.

295



296 Next, we performed two tests to assess social interaction by BDNF<sup>met/leu</sup> mice. First, a three-  
297 chamber test was performed to examine whether a BDNF<sup>met/leu</sup> mouse placed in the middle  
298 chamber prefers a stranger mouse (in one side chamber) to a novel object (in the opposite  
299 side chamber). The WT mice spent twice more time with a mouse than with an object (Figure  
300 5B). In contrast, the BDNF<sup>met/leu</sup> mice showed no preference to social partner, spending equal  
301 amount of time interacting with the mouse partner and the object (Figure 5B). Second, we  
302 measured the interaction of a BDNF<sup>met/leu</sup> mouse with their littermates in the home cage. A  
303 mouse generally interacts less with an aggressive littermate than with a non-aggressive one.  
304 We therefore measured the interactions with the two types of littermates separately.  
305 BDNF<sup>met/leu</sup> mice displayed dramatically reduced interaction time with both aggressive and  
306 non-aggressive littermates, compared with the WT mice (Figure 5C). These results indicated  
307 that social interaction was impaired in BDNF<sup>met/leu</sup> mice.  
308

### 309 **Hyperactivity and elevated stress response**

310 As most ASD mice models are reportedly hyperactive (De La Torre-Ubieta et al., 2016), we  
311 tested locomotion and motor ability of BDNF<sup>met/leu</sup> mice. In an open field test, the BDNF<sup>met/leu</sup>  
312 mice traveled much longer distances, approximately 1000cm/min, than their WT littermates  
313 (Figure 5D, left). They also traveled mostly in the center of the field, spending approximately  
314 40sec/min there (Figure 5D, center). There was no difference in their vertical activities  
315 between the BDNF<sup>met/leu</sup> mice and their WT littermates (Figure 5D, right). Interestingly, the  
316 hyperactivity phenotype appeared to be more apparent during the nighttime when the mice  
317 are mostly awake (Figure 5-supplement 1).  
318

319 While hyperactive, ASD patients often become restrictive and immobile when challenged or  
320 stressed (De La Torre-Ubieta et al., 2016). Tail-suspension test (TST) is often used to test  
321 stress-induced immobile behavior in mice. The BDNF<sup>met/leu</sup> mice (10-12-week old) showed  
322 significantly longer immobility time in TST than their WT littermates (Figure 6A). However,  
323 unlike in WTs, the immobility time was not shortened by fluoxetine (20 mg/kg, 30 min, i.p.),  
324 a selective serotonin reuptake inhibitor commonly used as an antidepressant (Crowley,  
325 Blendy, & Lucki, 2005)(Figure 6A). To determine whether prolonged immobility in TST is  
326 associated with stress, we determined blood concentrations of corticosterone, an adrenal  
327 steroid known to increase in response to stress. Blood samples were collected from the tail  
328 vein of BDNF<sup>met/leu</sup> and WT littermates reared in the same cage for 2 weeks. As expected, the  
329 blood corticosterone concentration in resting time in WT mice was comparable to that  
330 reported previously (Dugovic, Maccari, Weibel, Turek, & Van Reeth, 1999). In contrast, the  
331 BDNF<sup>met/leu</sup> mice demonstrated a 3-fold higher blood corticosterone concentration (Figure  
332 6B, Before stress), suggesting that BDNF<sup>met/leu</sup> animals are severely stressed compared with  
333 WT littermates reared in the same cage. However, 60 min after the exposure to  
334 immobilization stress, both BDNF<sup>met/leu</sup> and WT mice exhibited similar, elevated levels of  
335 corticosterone (Dugovic et al., 1999), (Figure 6B, right, After stress). Consistent with these  
336 results, in an unstressed home cage environment, the net weight of the adrenal glands, which  
337 secrete corticosterone (Jankord & Herman, 2008), was significantly higher in BDNF<sup>met/leu</sup>

338 than that in WT mice (Figure 6C, Adrenal gland/Body). As a negative control, the weight of  
339 the kidney did not differ between the BDNF<sup>met/leu</sup> and WT animals ((Figure 6C,  
340 Kidney/Body). These results suggest that mice deficient in proBDNF-processing are sensitive  
341 to stress and exhibit activation of the HPA axis under normal conditions.

342

343

#### 344 **Plasma proBDNF and BDNF levels in ASD patients and controls**

345 A number of previous studies have suggested that blood (serum) level of BDNF is  
346 proportional to its level in the brain (Klein et al., 2011). Given that the BDNF<sup>met/leu</sup> mice  
347 expressed excessive proBDNF in the brain, we determined whether blood proBDNF  
348 concentration was also elevated. However, blood platelets contain a large quantity of BDNF  
349 (Fujimura et al., 2002; Yamamoto & Gurney, 1990), which could interfere the accurate  
350 measurement of BDNF in the blood. Furthermore, the majority of ELISAs used in previous  
351 literature could not distinguish between proBDNF and mBDNF. We therefore measured  
352 proBDNF specifically, using plasma, which do not contain platelets or its content instead of  
353 serum. We used a sandwich ELISA, which included a capture antibody against the C-terminal  
354 BDNF, a detection antibody against the pro-domain of proBDNF, and another detection  
355 antibody against the N-terminal of mBDNF. This allowed us to measure both mBDNF and  
356 proBDNF levels simultaneously in the same sample. Unfortunately, our highly sensitive  
357 ELISA assay (down to 2 pg/ml) could not detect any trace amount of mBDNF nor proBDNF  
358 with the 10 ul of mouse blood. Consistent with this, several previous reports indicated that,  
359 unlike human and rat blood, mouse blood does not have BDNF (Klein et al., 2011; Radka,  
360 Holst, Fritsche, & Altar, 1996).

361

362 We therefore turned to examine the levels of mBDNF and proBDNF in the plasma of human  
363 ASD patients and healthy controls. We obtained 1 ml of blood from human volunteers  
364 (controls), 100 times the amount from mice. In the initial, pilot experiments, 9 ASD patients  
365 and 10 healthy volunteers were enrolled, with well-documented consent forms and the  
366 approval of the Institutional Ethics Board. The age of participants ranged from 3~13 years: 7  
367 boys and 3 girls in the ASD group; 1 boy and 10 girls in the control group (Table 1). Among  
368 those 10 ASD patients, all had delayed development of speech, and most showed repetitive  
369 behaviors, a common feature in ASD diagnosis. We also noticed that the intellectual abilities  
370 of at least 8 out of 10 ASD children were also impaired, suggesting that these ASD patients  
371 likely belonged to the traditional ASD, but not some special groups of ASD with normal  
372 intellectual ability, such as Asperger's syndrome.

373

374 Next, peripheral venous blood, from patients and controls. was collected in EDTA-coated  
375 tubes and centrifuged within 5 min to obtain plasma (see Methods). Using the sandwich  
376 ELISA specific for proBDNF and mBDNF, respectively, we found a selective increase in  
377 proBDNF, but not mBDNF, in the ASD patients (Figure 7, and Table 6). The concentration of  
378 proBDNF was 1316.17 pg/ml, whereas that of mBDNF was 946.27 pg/ml in ASD patients. In  
379 healthy controls, the concentration of proBDNF was 688.39 pg/ml, nearly half of that in the

380 ASD group. However, the concentration of mBDNF is 713.12 pg/ml, which was comparable  
381 to that in the ASD group. Thus, the increase in plasma proBDNF, but not mBDNF, is  
382 associated with ASD.

383

384 Furthermore, we observed, evaluated, and documented all related symptoms of these ASD  
385 patients (Table 2~5). 8 out of 10 patients were firmly diagnosed with ASD, while in the  
386 remaining two, autistic features were clearly found, but these features did not match the  
387 criteria of ASD diagnosis (Table 2). All patients exhibited conventional autistic features,  
388 including the delay of speech development (Table 2), intellectual disabilities (Table 2),  
389 repetitive behavior (Table 4), and ADHD (Table 4). However, in some of these ASD patients,  
390 we also observed unconventional symptoms, including delays in motor development (Table  
391 2), sleep disturbances (Table 3), anxiety (Table 4), self-injury (Table 4), obsessive behavior  
392 (Table 4), and aggressive behavior (Table 4). Interestingly, we found that the proBDNF data  
393 of ASD patients was associated with a few of these unconventional symptoms. Several ASD  
394 children with aggression, eye abnormalities, sleep disorders, and self-injurious behavior  
395 tended to express lower proBDNF levels (patient HN0544.p1, HN0555.p1, HN0557.p1, and  
396 HN0560.p1). This observation may imply that proBDNF is more likely a biomarker only for  
397 ASD with common features, rather than all the ASD subtypes. Further studies with a larger  
398 patient number are necessary to validate this point.

399

## 400 Discussion

401 Most of the previous models for ASD were based on SNPs or gene mutations found in ASD  
402 patients. However, emerging studies have shown that most of ASD patients are not familial  
403 but sporadic, and genetic association studies have identified numerous risk variations but few  
404 causal genes (De La Torre-Ubieta et al., 2016). Interestingly, nearly all well-founded ASD  
405 related genes, such as *fmr1*, *mecp2*, *scn1a*, and *cacnal1*, are associated with synaptic function  
406 (Amir et al., 1999; Bassell & Warren, 2008; De Rubeis et al., 2014; Mahoney et al., 2009;  
407 Oakley et al., 2011; Splawski et al., 2004). Furthermore, most ASD animal models exhibit  
408 reductions in synaptic density, synaptic protein synthesis, or synaptic plasticity. In this study,  
409 we took an unconventional approach, focusing not on genetic mutations but on the processing  
410 of BDNF, a neurotrophic protein known to play a critical role in synaptic function. We have  
411 developed an ASD-like mouse model in which synaptic function is decreased, through  
412 elevating the proBDNF level but reducing mBDNF level. To the best of our knowledge, this  
413 is the first ASD mouse model not based on genetic mutations, but on protein processing.

414

415 Due to the lack of tools to non-invasively detect cellular changes in human brain, we do not  
416 know the neuronal phenotypes in the brains of ASD patients. However, studies using  
417 postmortem ASD brain tissues have revealed increased spine density in many brain regions,  
418 such as the frontal, parietal and temporal lobes (Hutsler & Zhang, 2010; Tang et al., 2014).  
419 Efforts have been made to study neuronal phenotypes using ASD animal models. Compared  
420 with some of previous models, our BDNF<sup>met/leu</sup> mice exhibit more comprehensive neuronal

421 phenotypes relevant to ASD. Specifically, the BDNF<sup>met/leu</sup> mice showed reduced brain volume  
422 and dendritic complexity, increased thin spines but decreased mushroom spines, altered  
423 synaptic proteins, decreased basal synaptic transmission, and impairments in both LTP and  
424 LTD. While previously published ASD models display some synaptic deficits, there is no  
425 model that express all of these phenotypes (De La Torre-Ubieta et al., 2016). The similarity in  
426 the synaptic phenotypes between our BDNF<sup>met/leu</sup> mice and previous ASD models suggests  
427 that processing of BDNF protein, rather than genetic alteration of *Bdnf* gene, may be an  
428 important factor contributing to ASD etiology. However, animal and human studies have so  
429 far not implicated BDNF in ASD. Thus, our study provides the first link between ASD and  
430 BDNF. Given that BDNF is a key regulator of synaptic development and function (Lu, Pang,  
431 & Woo, 2005a), the present work also opens up a new direction for ASD research.

432  
433 Another important finding is that the BDNF<sup>met/leu</sup> mice exhibit comprehensive behavior  
434 deficits resembling humans with ASD. We showed the BDNF<sup>met/leu</sup> mice have impaired social  
435 interaction and repetitive behaviors, two key components in the diagnostic criteria for ASD as  
436 defined by DSM-5. Compared with all previously established ASD models, the repetitive  
437 behaviors of the BDNF<sup>met/leu</sup> mice are much stronger and more like the symptoms of human  
438 ASD patients. A unique aspect of the BDNF<sup>met/leu</sup> mice, not seen in other ASD models, is the  
439 strong and spontaneous ‘star-gazing’ stereotype (Movie #1), in the absence of any external  
440 stimuli (‘self-stimulating’). In many children with ASD, especially for those diagnosed with  
441 Tourette's syndrome, the ‘self-stimulating’ behaviors are extremely frequent and apparent,  
442 such as flapping their arms or wiggling their toes repeatedly (Kurlan, 2010; Leckman, 2002),  
443 which are categorically similar to the ‘star-gazing’ stereotype in the BDNF<sup>met/leu</sup> mice. It  
444 should be noted that the BDNF<sup>met/leu</sup> mice do not show over-grooming, a form of repetitive  
445 behavior observed in some ASD models but not in human ASD. Bead-burying, a repetitive  
446 behavior seen in some ASD models but not in ASD children, is also absent in our BDNF<sup>met/leu</sup>  
447 mice. Thus, the BDNF<sup>met/leu</sup> mice could be a different and perhaps better ASD model, with  
448 regards to ‘self-stimulating’ behaviors. Regardless, the robust behavioral phenotype of the  
449 BDNF<sup>met/leu</sup> mice provides a unique opportunity for mechanistic studies and drug testing.

450  
451 Finally, our preliminary data indicates that the plasma level of proBDNF could be used as a  
452 potential ASD biomarker that may help in monitoring disease progression and drug efficacy.  
453 Specifically, in the pilot experiment with 9 ASD patients and 10 healthy volunteers, we found  
454 that an increase in plasma proBDNF level, but not mBDNF level, is associated with ASD.  
455 However, a biomarker for clinical use requires both good sensitivity and specificity (Brower,  
456 2011). Our data (Figure 7 and Table 6) indicates that the concentration of proBDNF in the  
457 ASD group is twice of that in healthy controls, suggesting that the sensitivity of the current  
458 ELISA might be in the right range. Technologies exist to further improve the sensitivity  
459 greatly. Given the small sample size, we cannot claim the specific association of elevated  
460 proBDNF with ASD. Further studies with much larger sample sizes are necessary to validate  
461 the specificity of this potential biomarker and to investigate whether it is associated with a  
462 distinct ASD subtype. Previous studies have suggested that the plasma level of BDNF could

463 reflect BDNF concentration in the brain (Klein et al., 2011). It is unclear whether the plasma  
464 level of proBDNF also correlates with proBDNF concentration in the brain. The source and  
465 the functional implication of plasma proBDNF should also be investigated in the future.

466

467 Although most of the phenotypes found in the BDNF<sup>met/leu</sup> mice coincide with the symptoms  
468 of ASD patients or neuronal features of the other ASD models, the brain volume changes may  
469 not be the same as those found in human studies. In contrast to the decrease of brain volume  
470 in the BDNF<sup>met/leu</sup> mice, previous studies with large cohorts have shown brain overgrowth in  
471 ASD children (De La Torre-Ubieta et al., 2016). However, no such brain overgrowth was  
472 reliably detected in the adult ASD patients. In addition, neuroimaging analysis of ASD brains  
473 also showed decreased volume of the corpus callosum, cerebellum and brainstem (Penn,  
474 2006). These clinical observations suggest that brain volume may not be used as a general  
475 pathological criterion for ASD. Interestingly, mutations of the X-linked genes encoding  
476 neuroligins, which are known for their association with ASD, have been shown to lead to  
477 decreased brain volume (Jamain et al., 2003). Moreover, both neuroligins-3 and -4 knock-out  
478 mice, which could display all ASD-like phenotypes, have reduced brain volume (Baudouin et  
479 al., 2012; Jamain et al., 2008). Thus, our BDNF<sup>met/leu</sup> mice could be an ASD-like model  
480 similar to fragile X syndrome.

481

482 Another phenotype which shows a potential inconsistency with a previous finding is the  
483 reduced LTD of the BDNF<sup>met/leu</sup> mice. A previous study found an increase, not decrease, in  
484 hippocampal LTD in the heterozygotes of cleavage-resistant *probndfHA* knock-in mice (Yang  
485 et al., 2014). The design of *probndfHA* knockin line was such that the last two arginines on  
486 the proBDNF cleavage site was replaced by two alanines (RR→AA), and therefore, the  
487 cleavage of proBDNF was completely blocked. Since the homozygous *probndfHA* die at  
488 birth, only the heterozygous mice were used for the LTD experiment. The heterozygous  
489 *probndfHA* knock-in line contains one allele with uncleavable proBDNF and another WT  
490 allele. Thus, the proBDNF/mBDNF ratio should be approximately 1:1. The increased LTD  
491 seen in *probndfHA* heterozygotes is consistent with the observation that application of  
492 exogenous proBDNF to WT hippocampal slices facilitates LTD (Woo et al, 2015). In  
493 contrast, our BDNF<sup>met/leu</sup> mice are homozygous and the mBDNF level in this line was  
494 decreased by nearly 90% of that in the WT mice. The extremely low level of mBDNF in the  
495 BDNF<sup>met/leu</sup> mice may not maintain normal function and morphology of hippocampal spines  
496 and thus results in a decrease rather than an increase in LTD. This may explain the difference  
497 in LTD phenotype between our BDNF<sup>met/leu</sup> mice and the *probndfHA* heterozygous mice.

498

499 In summary, we have developed a new ASD model, not based on genetic mutations, but on  
500 protein processing, and provided a link between ASD and BDNF, a key factor for synaptic  
501 regulation. With its robust phenotypes, the BDNF<sup>met/leu</sup> mouse line may serve as a new ASD  
502 model with more comprehensive behavioral deficits resembling human autism patients.  
503 Finally, our preliminary study using human blood samples raises the possibility of using  
504 plasma proBDNF level as an ASD biomarker.



## 505 **Materials and Methods**

### 506 **Animals**

507 All animal experiments were performed in strict accordance with protocols that were  
508 approved by the Institutional Animal Care and Use Committee of AIST. All efforts were  
509 made to minimize animal suffering during the experiments. Animals  
510 All animal experiments were performed in strict accordance with protocols that were  
511 approved by the Institutional Animal Care and Use Committee of AIST (number.2019-084,  
512 approval date 6 June 2015). All efforts were made to minimize animal suffering during the  
513 experiments. Mice were housed with access to food and water ad libitum at constant room  
514 temperature ( $24 \pm 2^\circ\text{C}$ ) and were exposed to a 12 h light/dark cycle (lights on between 7 a.m.  
515 and 7 p.m.). All mice were housed in groups of 3–4 per cage.

### 516 **Generation of proBDNF knock-in mouse line**

517 Generation of proBDNF knock-in mouse line was described in the report of Kojima et al.  
518 (2020) (Kojima et al., 2020). Briefly, the proBDNF knock-in mouse line was generated by  
519 replacing the endogenous *Bdnf* allele with a cDNA encoding cleavage-resistant form of  
520 BDNF that contained two amino acid substitutions proximal to the cleavage site of proBDNF  
521 (Figure 1A, RVRR to MVLK). A 6.0 kb long arm fragment (NCBI accession number:  
522 AY057907; 49015–54460) and a 3.4 kb short arm fragment (55207–58754) flanking the 5'  
523 and 3' ends of mouse *Bdnf* exon 5, respectively, were amplified from 129SV mouse genomic  
524 DNA using PCR. The long and short arm fragments were introduced into the *Cla*I-*Not*I and  
525 *Pac*I-*Asc*I sites of the pMulti-ND 1.0 vector, respectively. A DNA fragment encoding mutant  
526 proBDNF was then inserted into the *Cla*I-*Not*I site of the targeting vector. A pGK-thymidine  
527 kinase gene was used as a negative selectable marker (Figure 1A, Vector). Linearized  
528 targeting vector was electroporated into embryonic stem (ES) cells of the D3 line (strain 129  
529 SV). DNA derived from G418-resistant ES clones was screened using PCR and positive ES  
530 clones were injected into blastocysts obtained from C57BL/6 mice. The injected blastocysts  
531 were then introduced into the uteri of pseudo-pregnant females. Chimeric mice were mated  
532 with C57BL/6 mice to produce heterozygotes, and these mice were subsequently crossed  
533 with mice expressing Cre recombinase in germ cells to excise the neo cassette.  
534 A genetic backcross to the 129/SvEv background were performed over 10 generations before  
535 the animals were used in behavioral analyses and all other analyses.

### 536 **Genotyping**

537 Genotyping of the proBDNF knock-in mouse line was performed according to our recent  
538 report (Kojima et al., 2020). using the following primers: 5'-TGCACCACCAACTGCTTAG-  
539 3' and 5'-GGATGCAGGGATGATGTTC-3'. PCR analyses using these primers generated 550  
540 bp and 320 bp DNA fragments from wild-type and mutant alleles, respectively. Genotyping  
541 of the p75NTR knock-out mice (*Ngfrtm1Jae*) from the Jackson Laboratory (Bar Harbor, ME)  
542 was performed using the following primers: 5'-GCTCAGGACTCGTGTCTCC-3', 5'-  
543 CCAAAGAAGGAATTGGTGA-3', and 5'-TGGATGTGGAATGTGTGCGAG-3'. PCR

546 analyses using these primers generated 386 bp and 193 bp DNA fragments from wild-type  
547 and mutant alleles, respectively. Genotyping of the BDNF knock-out mice (kindly provided  
548 by Prof. Nakamura, Tokyo University of Agriculture and Technology, Tokyo) was performed  
549 using the following primers: 5'-ATGAAAGAAGTAAACGTCCAC-3', 5'-  
550 CCAGCAGAAAGAGTAGAGGAG-3', and 5'-GGGAACTTCCTGACTAGGGG-3'. PCR  
551 analyses using these primers generated 275 bp and 340 bp DNA fragments from wild-type  
552 and mutant alleles, respectively. Wild-type mice with the background of 129S6/SvEv and  
553 C57BL/6/J were obtained from Taconic Biosciences (Hudson, NY) and Crea Japan (Shizuoka,  
554 Japan), respectively.

555

### 556 **Golgi impregnation of granule neurons in the hippocampal dentate gyrus**

557 Golgi impregnation of mouse brains was performed using the FD Rapid GolgiStain Kit.  
558 Dentate gyrus (DG) neurons were examined in the dorsal hippocampus. For Sholl analyses of  
559 dendritic arborization (Z. Y. Chen et al., 2006), Golgi-impregnated DG granule cells that met  
560 the following criteria were used: (i) isolated cell body with a clear relationship between the  
561 primary dendrite and the soma, (ii) presence of untruncated dendrites, (iii) consistent and  
562 dark impregnation along the extent of all of the dendrites, and (iv) relative isolation from  
563 neighboring impregnated cells that could interfere with the analysis. For quantitative  
564 analyses, 50 neurons from the hippocampal DG area were selected. The cells were traced  
565 under 40× magnification using Neurolucida software (MicroBrightField Inc., Colchester, VT)  
566 and the morphological traits were analyzed using the NeuroExplorer analysis package. The  
567 data were processed and statistical analyses were performed using Graph Pad Prism 4.0  
568 (Graph Pad Software Inc., San Diego, CA).

569

### 570 **Cavalieri analysis of Nissl-stained sections**

571 Cavalieri analysis of Nissl-stained sections were used for hippocampal volume estimation.  
572 Steroinvestigator software was applied to measure the entire volume of the hippocampus at  
573 4X objective magnification. The external capsule, alveus of hippocampus, and white matter  
574 were used as boundary landmarks. All sections throughout each hippocampus were traced  
575 and reconstructed. The Cavalieri estimator function was used to calculate the volume of each  
576 hippocampus. Following total hippocampal measurements, the cellular layer of each  
577 subregion of the hippocampus (DG, CA1, CA2/3) was traced separately and analyzed in the  
578 same manner.

579

### 580 **Immunohistochemistry**

581 Adult mice were anesthetized and transcardially perfused with phosphate buffered saline  
582 (PBS) followed by 4% paraformaldehyde in PBS. The brains were postfixed overnight at  
583 4°C, cryoprotected, and then cut into 30 µm sections. The sections were washed three times  
584 in PBS for 10 min, permeabilized with 0.2% Triton X-100 in PBS, washed a further three  
585 times in PBS for 10 min, incubated in 3% bovine serum albumin (BSA) in PBS for 2 h, and  
586 then incubated at 4°C for 48 h with anti-proBDNF rabbit antiserum(H. Koshimizu et al.,  
587 2009)diluted 1:500 in PBS containing 3% BSA. Subsequently, the sections were washed

588 three times in PBS for 5 min and then incubated with Alexa555 goat anti rabbit IgG (1:1000,  
589 Life Technologies, Carlsbad, CA) and 4',6'-diamidino-2-phenylindole dihydrochloride (1  
590 µg/ml, Life Technologies) for 2 hr. Fluorescent images were obtained using a Nikon C1  
591 confocal or Nikon Ti E inverted microscope (Nikon, Japan) and a 20× Plan Apo, NA 0.75  
592 numerical aperture objective lens (Nikon). Immunocytochemical staining using a rat  
593 monoclonal anti-mouse CD31 antibody (1:100; clone MEC 13.3; BD Pharmingen, San Jose,  
594 CA) was used to detect endothelial cells in the mouse heart. Purified anti-phospho-TrkB  
595 (pTrkB) antiserum, which was generously provided by Dr. Chao(Arevalo et al., 2006), was  
596 used to detect the activated TrkB receptor. Mouse heart sections were treated with 0.1%  
597 hydrogen peroxide and then incubated with the primary antibody. Signal amplification was  
598 performed using the avidin:biotinylated horseradish peroxidase complex method (Vectastain  
599 ABC; Vector Labs, Burlingame, CA). An anti-serotonin (5-HT) antibody (1:15,000; Inestar,  
600 Stillwater, MN) was used for immunocytochemical analyses of 5-HT in brain tissues and the  
601 fiber density was quantified as described by Lyons et al(Lyons et al., 1999).

602

### 603 **In situ hybridization**

604 Brains from 8-week-old mice were fixed by transcardial perfusion with PBS followed by 4%  
605 paraformaldehyde in PBS at 4°C. The brains were immersed in the fixative overnight at 4°C,  
606 treated with 20% sucrose in PBS, embedded in Tissue-Tek Optimal Cutting Temperature  
607 Compound (Sakura Finetek, Tokyo, Japan), and then frozen on a block of dry-ice. In situ  
608 hybridization was performed on 20 µm coronal sections. The hybridization and post-  
609 hybridization wash steps were performed at 65°C to avoid nonspecific binding. Stained  
610 sections were photographed under the bright field system of a BioRevo microscope  
611 (Keyence, Osaka, Japan).

612

### 613 **Immunoblotting**

614 Immunoblotting was performed according to our previous report(Suzuki et al., 2007). Briefly,  
615 hippocampal tissues were homogenized in cold lysis buffer comprising 50 mM Tris-HCl (pH  
616 7.4), 1 mM EDTA, 150 mM NaCl, 10 mM NaF, 1 mM Na<sub>3</sub>VO<sub>4</sub>, 1% Triton X-100, 10 mM  
617 Na<sub>2</sub>P<sub>2</sub>O<sub>7</sub>, 100 µM phenylarsine oxide, and 1% protease inhibitor cocktail (Complete Mini,  
618 Roche Diagnostics, Hertfordshire, UK). The lysed tissues were incubated at 4°C for 20 min  
619 and then centrifuged at 15,000 rpm for 15 min. The protein levels in the supernatants were  
620 determined using the BCA Protein Assay Kit (Pierce/Thermo Scientific, Rockford, IL). To  
621 detect BDNF, the lysates were boiled for 5 min at 100°C, separated on SDS-polyacrylamide  
622 gels, and then transferred to polyvinylidene fluoride membranes (Immobilon P; Millipore,  
623 Billerica, MA). The membranes were blocked in Tris-buffered saline containing 0.2% Tween-  
624 20 (TBST) and 5% BSA or Block Ace (Dainippon Pharmaceutical, Osaka, Japan), incubated  
625 with a rabbit polyclonal anti-BDNF antibody (N-20, Santa Cruz Biotechnology, San Diego,  
626 CA) in TBST containing 0.5% BSA or 1% Block Ace at room temperature for 90 min, and  
627 then washed three times with TBST. Subsequently, the membranes were incubated at room  
628 temperature for 30 min with peroxidase-conjugated secondary antibodies in TBST containing  
629 5% BSA and washed three times with TBST. The signal was detected using ImmunoStar

630 Reagents (Wako, Tokyo, Japan) or SuperSignal WestFemto Maximum Sensitivity Substrate  
631 (Pierce). The exposure time was adjusted such that the intensity of the bands was within the  
632 linear range. To quantify the amount of proBDNF relative to the amount of total BDNF, the  
633 blots were scanned and the images were converted to TIFF files and quantified using the NIH  
634 ImageJ software (version 1.37v). After subtracting the background in the same lane, the  
635 signals for proBDNF and mature BDNF were summed to obtain the total amount of BDNF.  
636

637 To detect other molecules, the lysates were separated on SDS-polyacrylamide gels and  
638 transferred to polyvinylidene fluoride membranes (Immobilon P membrane, Millipore). The  
639 membranes were blocked at room temperature for 30 min in TBST containing 5% skimmed  
640 milk (Nacalai Tesque, Kyoto, Japan), and then incubated with the primary antibodies in  
641 TBST containing 3% BSA at room temperature overnight. The following primary antibodies  
642 were used: anti-p75NTR (1:1000; clone D4B3; Cell Signaling Technology, Danvers, MA),  
643 anti-SorCS2 (1:500; R&D Systems, Minneapolis, MN), anti-SorCS3 (1:500; R&D Systems),  
644 anti-PSD-95 (1:1000; clone D27E11; Cell Signaling Technology), anti-SynGAP (1:1000;  
645 clone D88G1; Cell Signaling Technology), anti-GluN2B (1:1000; Alomone Labs, Jerusalem,  
646 Israel), anti-synapsin I (1:1000; Millipore), and anti- $\beta$ -actin (1:10000; clone AC-15; Sigma,  
647 St. Louis, MO). After washing, the membranes were incubated with TBST containing  
648 horseradish peroxidase-conjugated secondary antibody (1:1000; GE Healthcare, Pittsburgh,  
649 PA) for 1 h at room temperature. The blots were developed using Luminata Forte Western  
650 HRP substrate (Millipore) and images of the immunoblots were captured using an  
651 ImageQuant LAS500 (GE Healthcare) imaging system. Quantitative analyses of the band  
652 intensities were performed using ImageQuant software (Image Analysis Software v8.1, GE  
653 Healthcare). Hippocampal tissues were isolated from 9-week-old mice and rapidly  
654 homogenized in lysis buffer comprising 50 mM Tris-HCl (pH 7.4), 1 mM EDTA, 150 mM  
655 NaCl, 10 mM NaF, 1 mM Na<sub>3</sub>VO<sub>4</sub>, 1% Triton X-100, 10 mM Na<sub>2</sub>P<sub>2</sub>O<sub>7</sub>, 100  $\mu$ M phenylarsine  
656 oxide, 1% protease inhibitor cocktail, and 1% protein phosphatase inhibitor cocktail (Sigma).  
657 Lysed tissues were incubated at 4°C for 20 min and centrifuged at 15,000 rpm for 15 min.  
658 The protein levels in the supernatants were determined using the BCA Protein Assay kit  
659 (Pierce). Protein G Sepharose (50  $\mu$ l, GE Healthcare) was added to the hippocampal lysates  
660 and the mixture was rotated at 4°C for 60 min. After removing the Protein G Sepharose, 1  $\mu$ g  
661 of a rabbit monoclonal anti-p75NTR antibody (clone D4B3; Cell Signaling Technology) or  
662 mouse monoclonal anti-PSD-95 antibody (clone 7E3-1B8; Thermo Scientific, Pittsburgh, PA)  
663 was added to the supernatant (containing 2.5 mg of total protein). The lysates were incubated  
664 with the beads (50  $\mu$ l) at 4°C overnight. The immune complexes were then pelleted and  
665 immunoblotted with mouse monoclonal anti-PSD-95 (1:1000, Thermo Scientific), rabbit  
666 monoclonal anti-PSD-95 (1:1000; clone D27E11; Cell Signaling Technology), or rabbit  
667 monoclonal anti-SynGAP (1:1000; clone D88G1; Cell Signaling Technology).  
668

### 669 **Golgi staining and quantitative analyses of dendritic spine morphology**

670 Mice were anesthetized with isoflurane and the brains were removed and washed in ice-cold  
671 PBS (pH 7.4). Rapid Golgi staining was performed using the FD Rapid GolgiStain Kit (FD

672 NeuroTechnologies, Ellicott City, MD), according to the manufacturer's instructions. Briefly,  
673 whole brains were silver impregnated for 2 weeks, cryoprotected for 1 week, and then  
674 sectioned (80  $\mu$ m) on a sliding microtome (REM-700, Yamato Kohki. Industrial Co., Ltd.,  
675 Saitama, Japan). The sections were developed, clarified, and then coverslipped with resinous  
676 medium. During staining, image acquisition, and image analysis, the operators were blinded  
677 to the genotype of each animal. Images of secondary dendritic segments of hippocampal  
678 pyramidal neurons in the stratum radiatum in the CA1 region were obtained using an  
679 AxioObserver Z1 microscope (Zeiss, Oberkochen, Germany) with a 63 $\times$ /0.75 numerical  
680 aperture objective lens (LD PlanNeo; Zeiss) for high magnification imaging or a 20 $\times$ /0.8  
681 numerical aperture objective lens (PlanApo; Zeiss) for low magnification imaging, and a  
682 cooled CCD camera (CoolSnap HQ2; Photometrics, Tucson, AZ). For morphological  
683 analyses of dendritic spines, a z-series with 0.5  $\mu$ m intervals was created to visualize the  
684 entire extent of each dendritic process and to capture spine details in all focal planes. The  
685 density, maximum length, and maximum width of the dendritic protrusions was quantified  
686 using the Region Measurements tool of MetaMorph Software (Universal Imaging  
687 Corporation, West Chester, PA, USA) (10). The form factor of each protrusion, defined as the  
688 ratio of its maximum length to its maximum width, was calculated (Takahashi et al., 2003).  
689 The age, genotype, and number of mice used for morphological analyses are described in the  
690 figure legends. The morphologies of dendritic protrusions were quantified using 33–36  
691 segments of the secondary dendrites. These segments represented a total dendritic length of  
692 1329–1683  $\mu$ m per group of mice.

## 693 694 **Electrophysiology**

695 Field excitatory synaptic potentials were recorded as follows. Transverse slice was placed on  
696 custom-made recording chamber according to a previous report (Tominaga, Tominaga, &  
697 Ichikawa, 2002) with some modifications. Briefly, both sides of slice were perfused with  
698 carbogenized aCSF containing (in mM) 118 NaCl, 3 KCl, 2.5 CaCl<sub>2</sub>, 1.2 MgCl<sub>2</sub>, 11 D-glucose,  
699 10 HEPES, and 25 NaHCO<sub>3</sub>, at 2–3 ml/min at 28 C. Field EPSPs were elicited by 10–100  $\mu$ A  
700 constant currents pulse (100 microsecond duration) with Pt bipolar electrode (FHC) onto the  
701 Schaffer-collateral pathway and recorded with glass electrode filled with aCSF (1–2 M ohm).  
702 EPSPs were amplified by multiclamp700A (Axon instruments, Sunnydale CA, USA) and  
703 digitized at 10Hz (National Instruments, Austin, Texas, USA) controlled by WinLTP  
704 programs (Anderson, Fitzjohn, & Collingridge, 2012).

705  
706 To set stimulus intensities, maximum responses were determined by increasing stimulus  
707 intensity stepwise to saturating responses. For paired-pulse experiment and long-term  
708 potentiation experiments, stimulus intensity which elicit about 33% of maximum  
709 response were employed. Input-output relationship were studied by plotting fiber volley  
710 response amplitude (mV) against fEPSP slope (mV/ms). Paired-pulse responses were also  
711 recorded with various inter-pulse intervals from 500ms, 100ms, 50ms, 20ms and paired-pulse  
712 ratio (2nd pulse response to first response) were calculated. LTP was induced by four theta  
713 burst stimulation, which consist of 4 burst at 0.05Hz of theta burst stimuli (4 bursts at



714 10Hz of 5 pulse at 100Hz ). On the other hands, LTD was induced by low frequency  
715 simulation (1Hz 900 pulse). In case of LTD experiments, stimulus intensity which elicited  
716 50 % of maximum response was employed.

717

### 718 **Blood sampling and corticosterone measurements**

719 Corticosterone measurements were performed as described previously(Schmidt et al., 2007).  
720 To determine basal corticosterone levels, blood samples were collected between 10 and 12  
721 a.m. The mice were moved to an adjacent room and placed individually in a transparent  
722 restraint tube. Blood samples (approximately 100  $\mu$ l) were collected into plastic tubes from  
723 the tail vein without anesthesia, as described previously(Fluttert, Dalm, & Oitzl, 2000). In all  
724 cases, the time between the first disturbance of the animals and the sampling was less than 1  
725 min. Following blood collection, the mice were released and returned to their cages. Blood  
726 samples were separated by centrifugation at 4°C for 15 min and the plasma was stored in the  
727 freezer until use. To measure the change in blood corticosterone levels in response to acute  
728 stress, sampling was performed 60 min before and after restraint stress was initiated.  
729 Restraining was performed in plastic cylinders identical to those used for the prenatal stress  
730 procedure. The AssayMax Corticosterone ELISA Kit (Assaypro, St. Charles, MO) was used  
731 to measure corticosterone levels in the blood samples, according to the manufacturer's  
732 instructions.

733

### 734 **Reverse transcription and quantitative PCR**

735 Hippocampal tissues from adult (8–15-week-old) mice (single mutants: BDNF<sup>+/+</sup>, n = 9; and  
736 BDNF<sup>met/leu</sup>, n = 8; and double mutants: BDNF<sup>+/+</sup>; p75<sup>NGFR+/+</sup>, n = 6; BDNF<sup>+/+</sup>; p75<sup>NGFR+/-</sup>, n =  
737 7, BDNF<sup>met/leu</sup>; p75<sup>NGFR+/+</sup>, n = 7; and BDNF<sup>met/leu</sup>; p75<sup>NGFR+/-</sup>, n = 6) were dissected and  
738 stored in RNAlater (Applied Biosystems, Foster City, CA) at -30°C until use. Total RNA was  
739 extracted using ISOGEN reagent (Nippon Gene, Tokyo, Japan), treated with RNase-free  
740 DNase I (Qiagen, Valencia, CA) to remove contaminating genomic DNA, and then purified  
741 using the RNeasy Mini Kit (Qiagen), according to the manufacturer's instructions. Total RNA  
742 (0.5  $\mu$ g) was reverse-transcribed into cDNA using SuperScript III (Invitrogen, Carlsbad, CA)  
743 and an oligo (dT)<sub>20</sub> primer or BDNF<sub>rt</sub>-3 primer (for *Bdnf* antisense-specific PCR) in a total  
744 volume of 5  $\mu$ l. Quantitative real-time PCR was performed using the 7300 Real-Time PCR  
745 system (Applied Biosystems). Duplicate standards were included in each plate and each  
746 sample was measured in triplicate. PCR was performed in a total volume of 15  $\mu$ l containing  
747 1.5  $\mu$ l of diluted cDNA (1/80 dilution), specific forward and reverse primers (50 nM), and  
748 Power SYBR Green PCR Master Mix (Applied Biosystems). The PCR conditions for all  
749 genes were as follows: 50°C for 2 min, 95°C for 10 min, and then 40 cycles of 95°C for 15 s  
750 and 60°C for 1 min. All mRNA levels were normalized to those of Gapdh to adjust for small  
751 differences in the amount of input RNA. The primer sequences were as follows: BDrt-1 (for  
752 BDNF mRNA), 5'-TGTGTGACAAGTATTAGCGAGTGG-3'; BDrt-2 (for BDNF mRNA),  
753 5'-ATGGGATTACACTTGGTCTCGT-3'; BDrt-3 (for BDNF antisense RNA), 5'-  
754 ACTCTGGAGAGCGTGAATG-3'; BDrt-4 (for BDNF antisense RNA), 5'-  
755 GGCTCAAAGGCACTTGAC-3'; NGF-F, 5'-GATGGCATGCTGGACCCAAG-3'; NGF-R,

756 5'-CAACATGGACATTACGCTATGCAC-3'; NT3-F, 5'-GGATGATGACAAACACTGG-3';  
757 NT3-R, 5'-ACAAGGCACACACACAGGAA-3'; GAPDH-F, 5'-  
758 TGCACCACCAACTGCTTAGC-3'; and GAPDH-R, 5'-GGCATGGACTGTGGTCATGAG-  
759 3'. The expression levels of genes in mutant tissues were normalized to those of the  
760 corresponding genes in wild-type tissues.

761

### 762 **Tail-suspension test (TST) and antidepressant treatment**

763 For tail-suspension test (TST) (Figure 6), Male mice at 8-12-week-old with the indicated  
764 genotype were used. TST was performed on an automated tail suspension device (Muromachi  
765 Kikai, Tokyo, Japan). Animals were suspended from a strain gauge for 6 minutes. The  
766 settings for the equipment were time constant= 0.25, gain=4, threshold 1=3, and  
767 resolution=200 ms. Time spent immobile was recorded in seconds. To test the effect of  
768 antidepressant treatment on depressive-behavior, animals were administered saline or  
769 fluoxetine 30 min before the tail suspension test (10 mg/kg i.p.).

770

### 771 **Human plasma collection**

772 All human plasma collection protocols were approved by the Ethics Committee at Xiangya  
773 Hospital Central South University. 11 Autism children and their 10 normal siblings as control  
774 were recruited for blood sampling. Peripheral venous blood from patients and controls was  
775 collected in EDTA-coated tubes and centrifuged at 1000g, 10 minutes to obtain the raw  
776 plasma. Then, the raw plasma was centrifuged at 1000g, 10 minutes again to eliminate  
777 residual blood cells. All plasma samples were stored at -80°C before the proBDNF and  
778 BDNF ELISA experiment.

779

### 780 **BDNF and proBDNF ELISA**

781 BDNF and proBDNF protein levels were determined by a two-side ELISA (Genstar, China,  
782 C643-02 and C546-02) as described by the manufacturer. Plasma were loaded directly into 96  
783 well plates without dilution. Absorbance was recorded and analyzed using a Cytation BioTeK  
784 plate reader (Winooski, USA). BDNF and proBDNF concentration (pg/ml) was normalized  
785 to the volume of plasma in each sample.

786

### 787 **Statistics**

788 Typically, statistical significance was determined using Student's t-tests after confirming  
789 normal distribution of the data. In multi-bar figures, statistical significance was determined  
790 by analysis of variance followed by a post hoc test. Data are represented as the mean  $\pm$  SEM.

791

792

## 793 **Table Legends**

### 794 **Table 1 The general information of ASD patients and controls**

795 Subject ID, gender, birthday, recruit data, and age of all ASD patients and controls were  
796 displayed.

797

798 **Table 2 Neurodevelopment problems in the ASD patients**

799 Neurodevelopment symptoms of the ASD patients, including developmental delay of speech  
800 and motor ability, ASD or autistic features, and intellectual disability were summarized. In  
801 this and all the following tables, '+' represents a positive symptom in an ASD patient, '-'  
802 represents a negative one, and the blank means the information is not reported. Please note  
803 '+±' means the patient exhibit autistic features but not severe enough to be disagoised as the  
804 ASD.

805

806 **Table 3 Neurological problems in the ASD patients**

807 Neurological tests for epilepsy, EEG and MRI abnormalities, macrocephaly and sleep disorders  
808 in the ASD patients. Please note '+±' in the column of epilepsy means seizure was found in  
809 that patients, but not severe enough for epilepsy diagnosis.

810

811 **Table 4 Behavioral problems in the ASD patients**

812 Behavior problems, including, the repetitive behavior, ADHD, anxiety, obsessive behavior,  
813 self-injury, and aggressive behavior, were displayed in the ASD patients.

814

815 **Table 5 No systemic problems observed in the ASD patients**

816 Systemic features were documented for these ASD patients. No systemic problems, such as  
817 eye abnormalities, recurrent infections, hypotonia, hand deformity, and short stature were  
818 observed in all the ASD patients.

819

820 **Table 6 The mBDNF and proBDNF level of plasma in the ASD patients**

821 The mBDNF and proBDNF level of plasma in each of ASD patients were displayed.

822

823

824 **Table 1 The general information of ASD patients and controls**

| Subject ID | Gender | Birthday   | RecruitDate | Age (year) |
|------------|--------|------------|-------------|------------|
| ASD        |        |            |             |            |
| HN0539.p1  | M      | 2015/11/27 | 2018/12/9   | 3.04       |
| HN0543.p1  | M      | 2013/10/6  | 2018/12/9   | 5.18       |
| HN0544.p1  | M      | 2015/4/27  | 2018/12/9   | 3.62       |
| HN0555.p1  | F      | 2016/2/3   | 2018/12/16  | 2.87       |
| HN0557.p1  | F      | 2009/8/21  | 2018/12/16  | 9.33       |
| HN0560.p1  | F      | 2013/11/21 | 2019/1/4    | 5.12       |
| HN0562.p1  | M      | 2016/7/8   | 2019/3/20   | 2.70       |
| HN0612.p1  | M      | 2017/6/30  | 2019/7/21   | 2.06       |
| HN0620.p1  | M      | 2016/11/19 | 2019/7/21   | 2.67       |
| HN0620.p2  | M      | 2016/11/19 | 2019/7/21   | 2.67       |
| Control    |        |            |             |            |
| HN0539.s1  | F      | 2012/1/1   | 2018/12/9   | 6.94       |
| HN0543.s1  | F      | 2016/8/27  | 2018/12/9   | 2.28       |

|           |   |            |            |       |
|-----------|---|------------|------------|-------|
| HN0544.s1 | F | 2007/8/23  | 2018/12/16 | 11.32 |
| HN0555.s1 | F | 2013/3/13  | 2018/12/16 | 5.76  |
| HN0555.s2 | F | 2016/2/3   | 2018/12/16 | 2.87  |
| HN0557.s1 | F | 2005/6/17  | 2018/12/16 | 13.51 |
| HN0557.s2 | F | 2009/8/21  | 2018/12/16 | 9.33  |
| HN0560.s1 | F | 2006/9/2   | 2019/1/4   | 12.35 |
| HN0562.s1 | F | 2014/12/9  | 2019/3/20  | 4.28  |
| HN0612.s1 | M | 2015/6/26  | 2019/7/21  | 4.07  |
| HN0620.s1 | F | 2013/11/11 | 2019/7/21  | 5.69  |

825

826 Table 2 Neurodevelopment problems in the ASD patients.

| Subject ID | developmental delay (speech) | developmental delay (motor) | ASD/autistic features | Intellectual disability |
|------------|------------------------------|-----------------------------|-----------------------|-------------------------|
| HN0539.p1  | +                            |                             | ±                     | +                       |
| HN0543.p1  | +                            | +                           | +                     | +                       |
| HN0544.p1  | +                            | —                           | +                     | +                       |
| HN0555.p1  | +                            | +                           | +                     | +                       |
| HN0557.p1  | +                            |                             | +                     |                         |
| HN0560.p1  | +                            |                             | +                     |                         |
| HN0562.p1  | +                            |                             | +                     | +                       |
| HN0612.p1  | +                            | —                           | ±                     | +                       |
| HN0620.p1  | +                            | —                           | +                     | —                       |
| HN0620.p2  | +                            | —                           | +                     | +                       |

827

828

829 Table 3 Neurological problems in the ASD patients.

| Subject ID | Epilepsy /Seizure | EEG abnormalities | MRI Brain abnormalities | Macrocephaly | Sleep disturbances |
|------------|-------------------|-------------------|-------------------------|--------------|--------------------|
| HN0539.p1  |                   |                   |                         | —            | —                  |
| HN0543.p1  | —                 | —                 | —                       | —            | —                  |
| HN0544.p1  | —                 | —                 | —                       | —            | —                  |
| HN0555.p1  | —                 | —                 | —                       | —            | —                  |
| HN0557.p1  |                   |                   |                         | —            | +                  |
| HN0560.p1  |                   |                   |                         | —            | +                  |
| HN0562.p1  |                   |                   |                         | —            | —                  |
| HN0612.p1  | —                 | —                 | —                       | —            | —                  |
| HN0620.p1  | —                 |                   |                         | —            | —                  |
| HN0620.p2  | —                 |                   |                         | —            | —                  |

830

831 Table 4 Behavioral problems in the ASD patients

| Subject ID | Repetitive behavior | ADHD | Anxiety | Obsessive behavior | Self-injurious behavior | Aggressive behavior |
|------------|---------------------|------|---------|--------------------|-------------------------|---------------------|
| HN0539.p1  | +                   |      |         | —                  | —                       | —                   |
| HN0543.p1  | +                   | +    | —       | +                  | —                       | —                   |
| HN0544.p1  | +                   | +    | +       | —                  | —                       | —                   |
| HN0555.p1  | +                   | +    | —       | —                  | —                       | —                   |
| HN0557.p1  | +                   | +    | +       |                    | +                       | —                   |
| HN0560.p1  | +                   | +    |         |                    | —                       | +                   |
| HN0562.p1  | +                   | +    |         | +                  | +                       | —                   |
| HN0612.p1  |                     | —    | —       | —                  | —                       | —                   |
| HN0620.p1  | +                   | —    | —       | —                  | —                       | —                   |
| HN0620.p2  | +                   | —    | —       | —                  | —                       | —                   |

832

833

834

Table 5 No systemic problems observed in the ASD patients

| Subject ID | Eye abnormalities | Recurrent infections | Hypotonia | Hand deformity | Short stature |
|------------|-------------------|----------------------|-----------|----------------|---------------|
| HN0539.p1  | —                 |                      |           | —              | —             |
| HN0543.p1  | —                 | —                    | —         | —              | —             |
| HN0544.p1  | —                 | —                    | —         | —              | —             |
| HN0555.p1  | —                 | —                    | —         | —              | —             |
| HN0557.p1  |                   |                      |           | —              | —             |
| HN0560.p1  |                   |                      | —         | —              | —             |
| HN0562.p1  | —                 |                      | —         | —              | —             |
| HN0612.p1  | —                 | —                    | —         | —              | —             |
| HN0620.p1  | —                 | —                    | —         | —              | —             |
| HN0620.p2  | —                 | —                    | —         | —              | —             |

835

836

Table 6 The mBDNF and proBDNF level of plasma in the ASD patients.

| Subject ID | mBDNF level (pg/ml) | proBDNF level (pg/ml) |
|------------|---------------------|-----------------------|
| HN0539.p1  | 1172.76             | 1877.297              |
| HN0543.p1  | 132.7449            | 1495.534              |
| HN0544.p1  | 1693.265            | 608.195               |
| HN0555.p1  | 175.8991            | 824.8709              |
| HN0557.p1  | 92.91032            | 633.9897              |
| HN0560.p1  | 60.37873            | 740.608               |
| HN0562.p1  | 1621.231            | 878.18                |
| HN0612.p1  | 938.3997            | 950.4053              |
| HN0620.p1  | 1206.951            | 2589.232              |
| HN0620.p2  | 2368.13             | 2563.437              |

837



## 838 **Acknowledgements**

839 This work was supported by the Grant-in-Aid for Scientific Research on Priority Areas-  
840 Elucidation of neural network function in the brain-from the Ministry of Education, Culture,  
841 Sports, Science and Technology of Japan (40344171) (M.K.), by JST, CREST (T.M., H.K.,  
842 T.H. and M.K.), and by the National Natural Science Foundation of China (31730034,  
843 81501105), Beijing Municipal Science & Technology Commission (Z151100003915118),  
844 and Shenzhen Science, Technology and Innovation Commission (JCYJ20170411152419928  
845 and (GJHZ20170314151528005) to B.L.. The funding organizations had no role in the study  
846 design, data collection and analysis, the decision to publish, or the preparation of the  
847 manuscript.

## 849 **Author Contributions**

850 T.M., H.K., T.H., and M.K. (AIST) performed the biochemical assays, analyzed the data;  
851 T.M. and K.K.<sup>a</sup> (AIST), performed the electrophysiological experiments and analyzed the  
852 data; K.T., T.M.<sup>a,c</sup>, K.K.<sup>a,c</sup>, M.O., and M.K. (AIST) engaged in the behavioral analysis of  
853 mice; T.M., K.T., M.O., M.K. performed the analysis of neuronal morphology and its  
854 quantitative analysis; T.B. and K.X. collected plasma samples of ASD patients; H.Y.  
855 conducted the ELISA analysis; H.Y., T.M., K.T., B.L., T.M., H.K., and M.K. wrote the paper;  
856 B.L., H.Y. and M.K. conceived and supervised the project.

## 858 **Competing Interests**

859 The authors declare no conflict of interests.

## 861 **References**

- 862
- 863 Amir, R. E., Van Den Veyver, I. B., Wan, M., Tran, C. Q., Francke, U., & Zoghbi, H. Y.  
864 (1999). Rett syndrome is caused by mutations in X-linked MECP2, encoding  
865 methyl- CpG-binding protein 2. *Nature Genetics*, 23(2), 185-188.  
866 doi:10.1038/13810
- 867 Anderson, W. W., Fitzjohn, S. M., & Collingridge, G. L. (2012). Automated multi-slice  
868 extracellular and patch-clamp experiments using the WinLTP data acquisition  
869 system with automated perfusion control. *J Neurosci Methods*, 207(2), 148-  
870 160. doi:10.1016/j.jneumeth.2012.04.008
- 871 Arevalo, J. C., Waite, J., Rajagopal, R., Beyna, M., Chen, Z. Y., Lee, F. S., & Chao,  
872 M. V. (2006). Cell survival through Trk neurotrophin receptors is differentially  
873 regulated by ubiquitination. *Neuron*, 50(4), 549-559.  
874 doi:10.1016/j.neuron.2006.03.044
- 875 Barde, Y. A. (1994). Neurotrophins: a family of proteins supporting the survival of

- 876 neurons. *Prog Clin Biol Res*, 390, 45-56.
- 877 Bassell, G. J., & Warren, S. T. (2008). Fragile X syndrome: loss of local mRNA  
878 regulation alters synaptic development and function. *Neuron*, 60(2), 201-214.  
879 doi:10.1016/j.neuron.2008.10.004
- 880 Baudouin, S. J., Gaudias, J., Gerharz, S., Hatstatt, L., Zhou, K., Punnakkal, P., . . .  
881 Scheiffele, P. (2012). Shared synaptic pathophysiology in syndromic and  
882 nonsyndromic rodent models of autism. *Science*, 338(6103), 128-132.  
883 doi:10.1126/science.1224159
- 884 Bernardet, M., & Crusio, W. E. (2006). Fmr1 KO mice as a possible model of autistic  
885 features. *TheScientificWorldJournal*, 6, 1164-1176. doi:10.1100/tsw.2006.220
- 886 Bibel, M., & Barde, Y. A. (2000). Neurotrophins: key regulators of cell fate and cell  
887 shape in the vertebrate nervous system. *Genes Dev*, 14(23), 2919-2937.
- 888 Bourne, J. N., & Harris, K. M. (2008). Balancing structure and function at  
889 hippocampal dendritic spines. *Annu Rev Neurosci*, 31, 47-67.  
890 doi:10.1146/annurev.neuro.31.060407.125646
- 891 Breiderhoff, T., Christiansen, G. B., Pallesen, L. T., Vaegter, C., Nykjaer, A., Holm, M.  
892 M., . . . Willnow, T. E. (2013). Sortilin-related receptor SORCS3 is a  
893 postsynaptic modulator of synaptic depression and fear extinction. *PLoS One*,  
894 8(9), e75006. doi:10.1371/journal.pone.0075006
- 895 Brower, V. (2011). Biomarkers: Portents of malignancy. *Nature*, 471(7339), S19-21.  
896 doi:10.1038/471S19a
- 897 Ceni, C., Unsain, N., Zeinieh, M. P., & Barker, P. A. (2014). Neurotrophins in the  
898 regulation of cellular survival and death. *Handb Exp Pharmacol*, 220, 193-  
899 221. doi:10.1007/978-3-642-45106-5\_8
- 900 Chao, M. V., & Bothwell, M. (2002). Neurotrophins: to cleave or not to cleave.  
901 *Neuron*, 33(1), 9-12. doi:10.1016/s0896-6273(01)00573-6
- 902 Chen, L., Chetkovich, D. M., Petralia, R. S., Sweeney, N. T., Kawasaki, Y., Wenthold,  
903 R. J., . . . Nicoll, R. A. (2000). Stargazin regulates synaptic targeting of AMPA  
904 receptors by two distinct mechanisms. *Nature*, 408(6815), 936-943.  
905 doi:10.1038/35050030
- 906 Chen, Z. Y., Jing, D., Bath, K. G., Ieraci, A., Khan, T., Siao, C. J., . . . Lee, F. S.  
907 (2006). Genetic variant BDNF (Val66Met) polymorphism alters anxiety-related  
908 behavior. *Science*, 314(5796), 140-143. doi:10.1126/science.1129663
- 909 Crowley, J. J., Blendy, J. A., & Lucki, I. (2005). Strain-dependent antidepressant-like  
910 effects of citalopram in the mouse tail suspension test. *Psychopharmacology*  
911 (*Berl*), 183(2), 257-264. doi:10.1007/s00213-005-0166-5
- 912 de Anda, F. C., Rosario, A. L., Durak, O., Tran, T., Graff, J., Meletis, K., . . . Tsai, L. H.  
913 (2012). Autism spectrum disorder susceptibility gene TAOK2 affects basal  
914 dendrite formation in the neocortex. *Nat Neurosci*, 15(7), 1022-1031.  
915 doi:10.1038/nn.3141
- 916 De La Torre-Ubieta, L., Won, H., Stein, J. L., & Geschwind, D. H. (2016). Advancing  
917 the understanding of autism disease mechanisms through genetics. *Nature*

- 918 *Medicine*, 22(4), 345-361. doi:10.1038/nm.4071
- 919 De Rubeis, S., He, X., Goldberg, A. P., Poultney, C. S., Samocha, K., Cicek, A.  
920 E., . . . Buxbaum, J. D. (2014). Synaptic, transcriptional and chromatin genes  
921 disrupted in autism. *Nature*, 515(7526), 209-215. doi:10.1038/nature13772
- 922 de Vrij, F. M. S., Levenga, J., van der Linde, H. C., Koekkoek, S. K., De Zeeuw, C. I.,  
923 Nelson, D. L., . . . Willemsen, R. (2008). Rescue of behavioral phenotype and  
924 neuronal protrusion morphology in Fmr1 KO mice. *Neurobiology of Disease*,  
925 31(1), 127-132. doi:10.1016/j.nbd.2008.04.002
- 926 Deinhardt, K., Kim, T., Spellman, D. S., Mains, R. E., Eipper, B. A., Neubert, T. A., . . .  
927 Hempstead, B. L. (2011). Neuronal growth cone retraction relies on  
928 proneurotrophin receptor signaling through Rac. *Sci Signal*, 4(202), ra82.  
929 doi:10.1126/scisignal.2002060
- 930 Duffney, L. J., Zhong, P., Wei, J., Matas, E., Cheng, J., Qin, L., . . . Yan, Z. (2015).  
931 Autism-like Deficits in Shank3-Deficient Mice Are Rescued by Targeting Actin  
932 Regulators. *Cell Reports*, 11(9), 1400-1413. doi:10.1016/j.celrep.2015.04.064
- 933 Dugovic, C., Maccari, S., Weibel, L., Turek, F. W., & Van Reeth, O. (1999). High  
934 corticosterone levels in prenatally stressed rats predict persistent paradoxical  
935 sleep alterations. *J Neurosci*, 19(19), 8656-8664.
- 936 Fluttert, M., Dalm, S., & Oitzl, M. S. (2000). A refined method for sequential blood  
937 sampling by tail incision in rats. *Lab Anim*, 34(4), 372-378.  
938 doi:10.1258/002367700780387714
- 939 Folstein, S., & Rutter, M. (1977). Genetic influences and infantile autism. *Nature*,  
940 265(5596), 726-728.
- 941 Fujimura, H., Altar, C. A., Chen, R., Nakamura, T., Nakahashi, T., Kambayashi, J., . . .  
942 Tandon, N. N. (2002). Brain-derived neurotrophic factor is stored in human  
943 platelets and released by agonist stimulation. *Thromb Haemost*, 87(4), 728-  
944 734.
- 945 Fulp, C. T., Cho, G., Marsh, E. D., Nasrallah, I. M., Labosky, P. A., & Golden, J. A.  
946 (2008). Identification of Arx transcriptional targets in the developing basal  
947 forebrain. *Human Molecular Genetics*, 17(23), 3740-3760.  
948 doi:10.1093/hmg/ddn271
- 949 Glerup, S., Bolcho, U., Molgaard, S., Boggild, S., Vaegter, C. B., Smith, A. H., . . .  
950 Nykjaer, A. (2016). SorCS2 is required for BDNF-dependent plasticity in the  
951 hippocampus. *Mol Psychiatry*, 21(12), 1740-1751. doi:10.1038/mp.2016.108
- 952 Greenberg, M. E., Xu, B., Lu, B., & Hempstead, B. L. (2009). New insights in the  
953 biology of BDNF synthesis and release: implications in CNS function. *J*  
954 *Neurosci*, 29(41), 12764-12767. doi:10.1523/JNEUROSCI.3566-09.2009
- 955 Gross, C., Raj, N., Molinaro, G., Allen, A. G., Whyte, A. J., Gibson, J. R., . . . Bassell,  
956 G. J. (2015). Selective role of the catalytic PI3K subunit p110beta in impaired  
957 higher order cognition in fragile X syndrome. *Cell Rep*, 11(5), 681-688.  
958 doi:10.1016/j.celrep.2015.03.065
- 959 Harris, K. M., Jensen, F. E., & Tsao, B. (1992). Three-dimensional structure of

- 960 dendritic spines and synapses in rat hippocampus (CA1) at postnatal day 15  
961 and adult ages: implications for the maturation of synaptic physiology and  
962 long-term potentiation. *J Neurosci*, 12(7), 2685-2705.
- 963 Huber, K. M., Gallagher, S. M., Warren, S. T., & Bear, M. F. (2002). Altered synaptic  
964 plasticity in a mouse model of fragile X mental retardation. *Proceedings of the  
965 National Academy of Sciences of the United States of America*, 99(11), 7746-  
966 7750. doi:10.1073/pnas.122205699
- 967 Hutsler, J. J., & Zhang, H. (2010). Increased dendritic spine densities on cortical  
968 projection neurons in autism spectrum disorders. *Brain Res*, 1309, 83-94.  
969 doi:10.1016/j.brainres.2009.09.120
- 970 Jamain, S., Quach, H., Betancur, C., Rastam, M., Colineaux, C., Gillberg, I. C., . . .  
971 Bourgeron, T. (2003). Mutations of the X-linked genes encoding neuroligins  
972 NLGN3 and NLGN4 are associated with autism. *Nat Genet*, 34(1), 27-29.  
973 doi:10.1038/ng1136
- 974 Jamain, S., Radyushkin, K., Hammerschmidt, K., Granon, S., Boretius, S.,  
975 Varoqueaux, F., . . . Brose, N. (2008). Reduced social interaction and  
976 ultrasonic communication in a mouse model of monogenic heritable autism.  
977 *Proc Natl Acad Sci U S A*, 105(5), 1710-1715. doi:10.1073/pnas.0711555105
- 978 Jankord, R., & Herman, J. P. (2008). Limbic regulation of hypothalamo-pituitary-  
979 adrenocortical function during acute and chronic stress. *Ann N Y Acad Sci*,  
980 1148, 64-73. doi:10.1196/annals.1410.012
- 981 Je, H. S., Yang, F., Ji, Y., Nagappan, G., Hempstead, B. L., & Lu, B. (2012). Role of  
982 pro-brain-derived neurotrophic factor (proBDNF) to mature BDNF conversion  
983 in activity-dependent competition at developing neuromuscular synapses.  
984 *Proc Natl Acad Sci U S A*, 109(39), 15924-15929.  
985 doi:10.1073/pnas.1207767109
- 986 Je, H. S., Yang, F., Ji, Y., Potluri, S., Fu, X. Q., Luo, Z. G., . . . Lu, B. (2013).  
987 ProBDNF and mature BDNF as punishment and reward signals for synapse  
988 elimination at mouse neuromuscular junctions. *J Neurosci*, 33(24), 9957-  
989 9962. doi:10.1523/JNEUROSCI.0163-13.2013
- 990 Kaplan, D. R., & Miller, F. D. (2007). Developing with BDNF: A Moving Experience.  
991 *Neuron*, 55(1), 1-2. doi:10.1016/j.neuron.2007.06.025
- 992 Keifer, J., Sabirzhanov, B. E., Zheng, Z., Li, W., & Clark, T. G. (2009). Cleavage of  
993 proBDNF to BDNF by a tollid-like metalloproteinase is required for  
994 acquisition of in vitro eyeblink classical conditioning. *J Neurosci*, 29(47),  
995 14956-14964. doi:10.1523/jneurosci.3649-09.2009
- 996 Khatri, N., Gilbert, J. P., Huo, Y., Sharafli, R., Nee, M., Qiao, H., & Man, H. Y.  
997 (2018). The Autism Protein Ube3A/E6AP Remodels Neuronal Dendritic  
998 Arborization via Caspase-Dependent Microtubule Destabilization. *J Neurosci*,  
999 38(2), 363-378. doi:10.1523/jneurosci.1511-17.2017
- 1000 Kim, J. H., Liao, D., Lau, L. F., & Huganir, R. L. (1998). SynGAP: a synaptic RasGAP  
1001 that associates with the PSD-95/SAP90 protein family. *Neuron*, 20(4), 683-

- 1002 691.
- 1003 Klein, A. B., Williamson, R., Santini, M. A., Clemmensen, C., Ettrup, A., Rios, M., . . .
- 1004 Aznar, S. (2011). Blood BDNF concentrations reflect brain-tissue BDNF levels
- 1005 across species. *Int J Neuropsychopharmacol*, *14*(3), 347-353.
- 1006 doi:10.1017/s1461145710000738
- 1007 Kojima, M., Otabi, H., Kumanogoh, H., Toyoda, A., Ikawa, M., Okabe, M., & Mizui, T.
- 1008 (2020). Reduction in BDNF from Inefficient Precursor Conversion Influences
- 1009 Nest Building and Promotes Depressive-Like Behavior in Mice. *Int J Mol Sci*,
- 1010 *21*(11). doi:10.3390/ijms21113984
- 1011 Koshimizu, H., Kiyosue, K., Hara, T., Hazama, S., Suzuki, S., Uegaki, K., . . . Kojima,
- 1012 M. (2009). Multiple functions of precursor BDNF to CNS neurons: negative
- 1013 regulation of neurite growth, spine formation and cell survival. *Mol Brain*, *2*(1),
- 1014 27. doi:1756-6606-2-27 [pii]
- 1015 10.1186/1756-6606-2-27
- 1016 Koshimizu, M., Kurashima, S., Taguchi, M., Iwamatsu, K., Kimura, A., & Asai, K.
- 1017 (2015). System for measuring temporal profiles of scintillation at high and
- 1018 different linear energy transfers by using pulsed ion beams. *Rev Sci Instrum*,
- 1019 *86*(1), 013101. doi:10.1063/1.4904872
- 1020 Kurlan, R. (2010). Clinical practice. Tourette's Syndrome. *N Engl J Med*, *363*(24),
- 1021 2332-2338. doi:10.1056/NEJMcp1007805
- 1022 Leckman, J. F. (2002). Tourette's syndrome. *Lancet*, *360*(9345), 1577-1586.
- 1023 doi:10.1016/s0140-6736(02)11526-1
- 1024 Lee, R., Kermani, P., Teng, K. K., & Hempstead, B. L. (2001). Regulation of cell
- 1025 survival by secreted proneurotrophins. *Science*, *294*(5548), 1945-1948.
- 1026 doi:10.1126/science.1065057
- 1027 Lim, C. S., Hoang, E. T., Viar, K. E., Stornetta, R. L., Scott, M. M., & Zhu, J. J.
- 1028 (2014). Pharmacological rescue of Ras signaling, GluA1-dependent synaptic
- 1029 plasticity, and learning deficits in a fragile X model. *Genes Dev*, *28*(3), 273-
- 1030 289. doi:10.1101/gad.232470.113
- 1031 Liu, L., Wong, T. P., Pozza, M. F., Lingenhoehl, K., Wang, Y., Sheng, M., . . . Wang, Y.
- 1032 T. (2004). Role of NMDA receptor subtypes in governing the direction of
- 1033 hippocampal synaptic plasticity. *Science*, *304*(5673), 1021-1024.
- 1034 doi:10.1126/science.1096615
- 1035 Lu, B., Nagappan, G., Guan, X., Nathan, P. J., & Wren, P. (2013). BDNF-based
- 1036 synaptic repair as a disease-modifying strategy for neurodegenerative
- 1037 diseases. *Nature Reviews Neuroscience*, *14*(6), 401-416.
- 1038 doi:10.1038/nrn3505
- 1039 Lu, B., Pang, P. T., & Woo, N. H. (2005a). The yin and yang of neurotrophin action.
- 1040 *Nature Reviews Neuroscience*, *6*(8), 603-614. doi:10.1038/nrn1726
- 1041 Lu, B., Pang, P. T., & Woo, N. H. (2005b). The yin and yang of neurotrophin action.
- 1042 *Nat Rev Neurosci*, *6*(8), 603-614. doi:10.1038/nrn1726
- 1043 Lyons, W. E., Mamounas, L. A., Ricaurte, G. A., Coppola, V., Reid, S. W., Bora, S.



- 1044 H., . . . Tessarollo, L. (1999). Brain-derived neurotrophic factor-deficient mice  
1045 develop aggressiveness and hyperphagia in conjunction with brain  
1046 serotonergic abnormalities. *Proc Natl Acad Sci U S A*, *96*(26), 15239-15244.
- 1047 Mahoney, K., Moore, S. J., Buckley, D., Alam, M., Parfrey, P., Penney, S., . . . Young,  
1048 T. L. (2009). Variable neurologic phenotype in a GEFS+ family with a novel  
1049 mutation in SCN1A. *Seizure*, *18*(7), 492-497.  
1050 doi:10.1016/j.seizure.2009.04.009
- 1051 Massey, P. V., Johnson, B. E., Moulton, P. R., Auberson, Y. P., Brown, M. W., Molnar,  
1052 E., . . . Bashir, Z. I. (2004). Differential roles of NR2A and NR2B-containing  
1053 NMDA receptors in cortical long-term potentiation and long-term depression. *J*  
1054 *Neurosci*, *24*(36), 7821-7828. doi:10.1523/JNEUROSCI.1697-04.2004
- 1055 Matsuzaki, M., Ellis-Davies, G. C., Nemoto, T., Miyashita, Y., Iino, M., & Kasai, H.  
1056 (2001). Dendritic spine geometry is critical for AMPA receptor expression in  
1057 hippocampal CA1 pyramidal neurons. *Nat Neurosci*, *4*(11), 1086-1092.  
1058 doi:10.1038/nn736
- 1059 Miles, J. H. (2011). Autism spectrum disorders--a genetics review. *Genet Med*, *13*(4),  
1060 278-294. doi:10.1097/GIM.0b013e3181ff67ba
- 1061 Mizui, T., Ishikawa, Y., Kumanogoh, H., Lume, M., Matsumoto, T., Hara, T., . . .  
1062 Kojima, M. (2015). BDNF pro-peptide actions facilitate hippocampal LTD and  
1063 are altered by the common BDNF polymorphism Val66Met. *Proc Natl Acad*  
1064 *Sci U S A*, *112*(23), E3067-3074. doi:10.1073/pnas.1422336112
- 1065 Mowla, S. J., Farhadi, H. F., Pareek, S., Atwal, J. K., Morris, S. J., Seidah, N. G., &  
1066 Murphy, R. A. (2001). Biosynthesis and post-translational processing of the  
1067 precursor to brain-derived neurotrophic factor. *J Biol Chem*, *276*(16), 12660-  
1068 12666. doi:10.1074/jbc.M008104200
- 1069 Mullins, C., Fishell, G., & Tsien, R. W. (2016). Unifying Views of Autism Spectrum  
1070 Disorders: A Consideration of Autoregulatory Feedback Loops. *Neuron*, *89*(6),  
1071 1131-1156. doi:10.1016/j.neuron.2016.02.017
- 1072 Nagappan, G., Zaitsev, E., Senatorov, V. V., Jr., Yang, J., Hempstead, B. L., & Lu, B.  
1073 (2009). Control of extracellular cleavage of ProBDNF by high frequency  
1074 neuronal activity. *Proc Natl Acad Sci U S A*, *106*(4), 1267-1272.  
1075 doi:10.1073/pnas.0807322106
- 1076 Oakley, J. C., Kalume, F., & Catterall, W. A. (2011). Insights into pathophysiology and  
1077 therapy from a mouse model of Dravet syndrome. *Epilepsia*, *52*(SUPPL. 2),  
1078 59-61. doi:10.1111/j.1528-1167.2011.03004.x
- 1079 Pang, P. T., Nagappan, G., Guo, W., & Lu, B. (2016). Extracellular and intracellular  
1080 cleavages of proBDNF required at two distinct stages of late-phase LTP. *Npj*  
1081 *Science Of Learning*, *1*, 16003. doi:10.1038/npjscilearn.2016.3  
1082 <https://www.nature.com/articles/npjscilearn20163#supplementary-information>
- 1083 Pang, P. T., Teng, H. K., Zaitsev, E., Woo, N. T., Sakata, K., Zhen, S., . . . Lu, B.  
1084 (2004). Cleavage of proBDNF by tPA/plasmin is essential for long-term  
1085 hippocampal plasticity. *Science*, *306*(5695), 487-491.

- 1086 doi:10.1126/science.1100135
- 1087 Park, H., & Poo, M. M. (2013). Neurotrophin regulation of neural circuit development  
1088 and function. *Nat Rev Neurosci*, 14(1), 7-23. doi:10.1038/nrn3379
- 1089 Peça, J., Feliciano, C., Ting, J. T., Wang, W., Wells, M. F., Venkatraman, T. N., . . .  
1090 Feng, G. (2011). Shank3 mutant mice display autistic-like behaviours and  
1091 striatal dysfunction. *Nature*, 472(7344), 437-442. doi:10.1038/nature09965
- 1092 Penn, H. E. (2006). Neurobiological correlates of autism: a review of recent  
1093 research. *Child Neuropsychol*, 12(1), 57-79.  
1094 doi:10.1080/09297040500253546
- 1095 Radka, S. F., Holst, P. A., Fritsche, M., & Altar, C. A. (1996). Presence of brain-  
1096 derived neurotrophic factor in brain and human and rat but not mouse serum  
1097 detected by a sensitive and specific immunoassay. *Brain Res*, 709(1), 122-  
1098 301. doi:10.1016/0006-8993(95)01321-0
- 1099 Reichardt, L. F. (2006). Neurotrophin-regulated signalling pathways. *Philos Trans R*  
1100 *Soc Lond B Biol Sci*, 361(1473), 1545-1564.
- 1101 Rosch, H., Schweigreiter, R., Bonhoeffer, T., Barde, Y. A., & Korte, M. (2005). The  
1102 neurotrophin receptor p75NTR modulates long-term depression and regulates  
1103 the expression of AMPA receptor subunits in the hippocampus. *Proc Natl*  
1104 *Acad Sci U S A*, 102(20), 7362-7367. doi:10.1073/pnas.0502460102
- 1105 Schmidt, M. V., Sterlemann, V., Ganea, K., Liebl, C., Alam, S., Harbich, D., . . .  
1106 Muller, M. B. (2007). Persistent neuroendocrine and behavioral effects of a  
1107 novel, etiologically relevant mouse paradigm for chronic social stress during  
1108 adolescence. *Psychoneuroendocrinology*, 32(5), 417-429.  
1109 doi:10.1016/j.psyneuen.2007.02.011
- 1110 Splawski, I., Timothy, K. W., Sharpe, L. M., Decher, N., Kumar, P., Bloise, R., . . .  
1111 Keating, M. T. (2004). Ca(V)1.2 calcium channel dysfunction causes a  
1112 multisystem disorder including arrhythmia and autism. *Cell*, 119(1), 19-31.  
1113 doi:10.1016/j.cell.2004.09.011
- 1114 Suzuki, S., Kiyosue, K., Hazama, S., Ogura, A., Kashihara, M., Hara, T., . . . Kojima,  
1115 M. (2007). Brain-derived neurotrophic factor regulates cholesterol metabolism  
1116 for synapse development. *J Neurosci*, 27(24), 6417-6427.
- 1117 Takahashi, H., Sekino, Y., Tanaka, S., Mizui, T., Kishi, S., & Shirao, T. (2003).  
1118 Drebrin-dependent actin clustering in dendritic filopodia governs synaptic  
1119 targeting of postsynaptic density-95 and dendritic spine morphogenesis. *J*  
1120 *Neurosci*, 23(16), 6586-6595. doi:23/16/6586 [pii]
- 1121 Tang, G., Gudsnek, K., Kuo, S. H., Cotrina, M. L., Rosoklija, G., Sosunov, A., . . .  
1122 Sulzer, D. (2014). Loss of mTOR-dependent macroautophagy causes autistic-  
1123 like synaptic pruning deficits. *Neuron*, 83(5), 1131-1143.  
1124 doi:10.1016/j.neuron.2014.07.040
- 1125 Teng, H. K., Teng, K. K., Lee, R., Wright, S., Tevar, S., Almeida, R. D., . . .  
1126 Hempstead, B. L. (2005). ProBDNF induces neuronal apoptosis via activation  
1127 of a receptor complex of p75NTR and sortilin. *J Neurosci*, 25(22), 5455-5463.

- 1128 Timmusk, T., Palm, K., Metsis, M., Reintam, T., Paalme, V., Saarma, M., & Persson,  
1129 H. (1993). Multiple promoters direct tissue-specific expression of the rat BDNF  
1130 gene. *Neuron*, *10*(3), 475-489.
- 1131 Tominaga, T., Tominaga, Y., & Ichikawa, M. (2002). Optical imaging of long-lasting  
1132 depolarization on burst stimulation in area CA1 of rat hippocampal slices. *J*  
1133 *Neurophysiol*, *88*(3), 1523-1532. doi:10.1152/jn.2002.88.3.1523
- 1134 Vazquez, L. E., Chen, H. J., Sokolova, I., Knuesel, I., & Kennedy, M. B. (2004).  
1135 SynGAP regulates spine formation. *J Neurosci*, *24*(40), 8862-8872.  
1136 doi:10.1523/JNEUROSCI.3213-04.2004
- 1137 Volosin, M., Song, W., Almeida, R. D., Kaplan, D. R., Hempstead, B. L., & Friedman,  
1138 W. J. (2006). Interaction of survival and death signaling in basal forebrain  
1139 neurons: roles of neurotrophins and proneurotrophins. *J Neurosci*, *26*(29),  
1140 7756-7766.
- 1141 Won, H., Lee, H. R., Gee, H. Y., Mah, W., Kim, J. I., Lee, J., . . . Kim, E. (2012).  
1142 Autistic-like social behaviour in Shank2-mutant mice improved by restoring  
1143 NMDA receptor function. *Nature*, *486*(7402), 261-265.  
1144 doi:10.1038/nature11208
- 1145 Woo, N. H., Teng, H. K., Siao, C. J., Chiaruttini, C., Pang, P. T., Milner, T. A., . . . Lu,  
1146 B. (2005). Activation of p75NTR by proBDNF facilitates hippocampal long-  
1147 term depression. *Nat Neurosci*, *8*(8), 1069-1077. doi:10.1038/nn1510
- 1148 Yamamoto, H., & Gurney, M. E. (1990). Human platelets contain brain-derived  
1149 neurotrophic factor. *J Neurosci*, *10*(11), 3469-3478.
- 1150 Yang, F., Je, H. S., Ji, Y., Nagappan, G., Hempstead, B., & Lu, B. (2009). Pro-BDNF-  
1151 induced synaptic depression and retraction at developing neuromuscular  
1152 synapses. *J Cell Biol*, *185*(4), 727-741. doi:10.1083/jcb.200811147
- 1153 Yang, J., Harte-Hargrove, L. C., Siao, C. J., Marinic, T., Clarke, R., Ma, Q., . . .  
1154 Hempstead, B. L. (2014). proBDNF negatively regulates neuronal remodeling,  
1155 synaptic transmission, and synaptic plasticity in hippocampus. *Cell Rep*, *7*(3),  
1156 796-806. doi:10.1016/j.celrep.2014.03.040
- 1157 Yang, J., Siao, C. J., Nagappan, G., Marinic, T., Jing, D., McGrath, K., . . .  
1158 Hempstead, B. L. (2009). Neuronal release of proBDNF. *Nat Neurosci*, *12*(2),  
1159 113-115. doi:10.1038/nn.2244
- 1160 Zhou, X. F., Song, X. Y., Zhong, J. H., Barati, S., Zhou, F. H., & Johnson, S. M.  
1161 (2004). Distribution and localization of pro-brain-derived neurotrophic factor-  
1162 like immunoreactivity in the peripheral and central nervous system of the adult  
1163 rat. *J Neurochem*, *91*(3), 704-715. doi:10.1111/j.1471-4159.2004.02775.x  
1164

## Figure 1

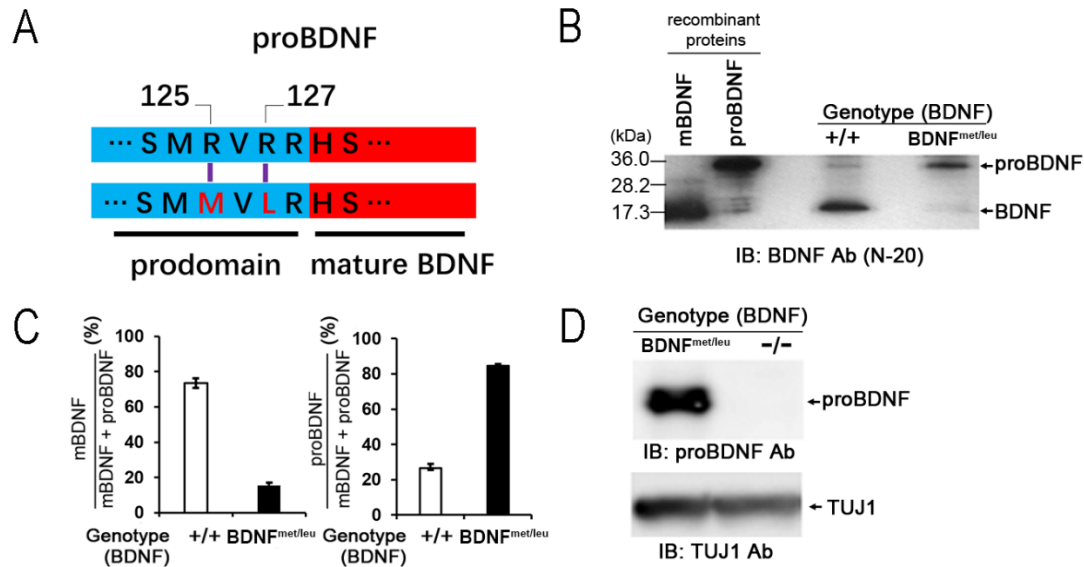

### BDNF<sup>met/leu</sup> knock-in mice expressing excessive proBDNF but residual mBDNF.

(A) Schematic diagram showing the replacement of two arginine (R) with a methionine (M) and a leucine (L) in the conserved cleavage site of the *bdnf* gene to generate a cDNA encoding cleavage-resistant-type proBDNF. (B) Immunoblot analyses of BDNF protein expression in the hippocampus. Hippocampal lysates (30  $\mu$ g of protein/lane) from 8-week-old littermates (wild type (+/+ or BDNF<sup>+/+</sup>) and BDNF<sup>met/leu</sup> knock-in mice were processed for Western blot and probed with an antibody against the C-terminus of BDNF (N-20). Recombinant mature BDNF (mBDNF) and proBDNF proteins were used for comparison. (C) Quantification of the mBDNF or proBDNF bands on Western blot using Image J. N = 3 littermate mice per group. Note a dramatic increase in proBDNF and a dramatic decrease in mBDNF. In this and all other figures, bar graphs represented as the mean  $\pm$  SEM. Student's t-test was performed unless indicated otherwise. \*:  $p < 0.05$ ; \*\*:  $p < 0.001$ . (D) Detection of proBDNF in BDNF<sup>met/leu</sup> hippocampus, using a proBDNF-specific antibody. Hippocampal lysates from 10-day-old *Bdnf* homozygous knockout mice (-/-) were used as a negative control.

## Figure 2

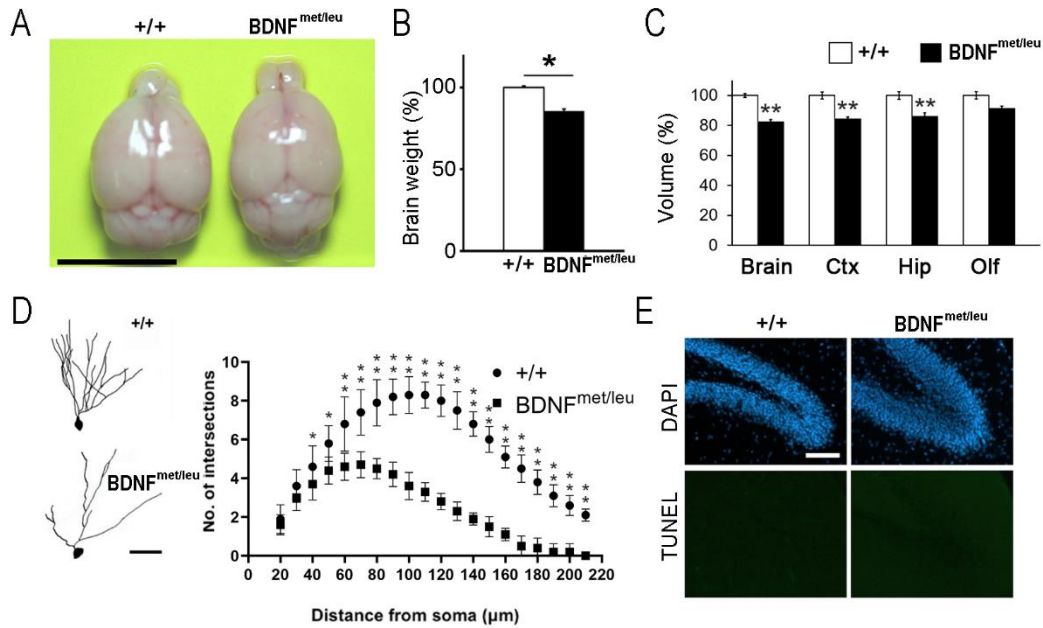

### Decrease in brain volume and dendritic arborization in $BDNF^{met/leu}$ mutants.

(A) Gross view of representative brains of  $+/+$  and  $BDNF^{met/leu}$  littermates. Scale bars: 10 mm. (B) Quantification of brain weights of 2-month-old mice with the indicated genotype.  $N = 6$  animals per group. (C) Cavalieri analyses of Nissl-stained brain sections of  $+/+$  and  $BDNF^{met/leu}$  littermates showing volumes of whole brain and its sub-regions.  $N = 6$  animals per genotype. Ctx: cortex; Hip: hippocampus; Olf: olfactory bulb. (D) Sholl analyses of dentate gyrus (DG) neurons from 8-week-old mice  $N = 10$  neurons per group. Left: an example of the Golgi-stained neurons. Scale bars: 50  $\mu\text{m}$ . (E) Detection of apoptotic cells in DG granule cell layers. Coronal sections of hippocampi from 8-week-old mice were stained using a TUNEL assay. Scale bars: 100  $\mu\text{m}$ .



## Figure 3

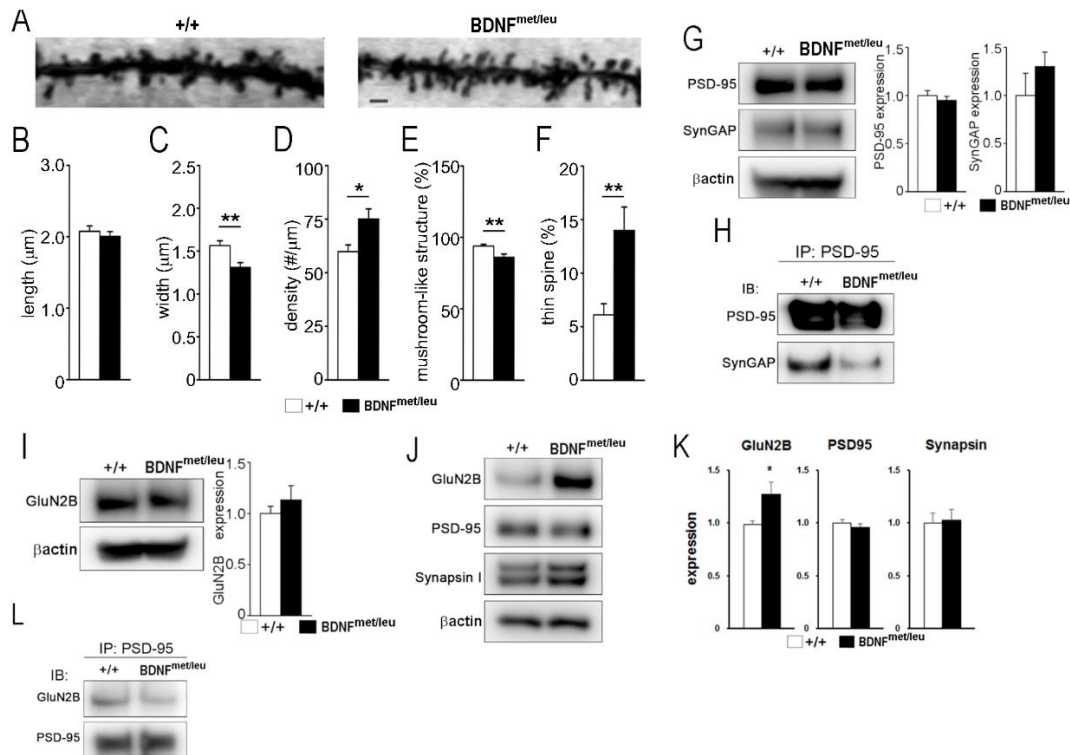

### Alterations in dendritic spines and interactions of postsynaptic proteins.

(A) Representative high-magnification images of Golgi-stained CA1 pyramidal neurons isolated from 9-week-old +/+ and BDNF<sup>met/leu</sup> littermates. Scale bar, 2 µm. (B–F) Quantitative analyses of the morphologies of secondary dendritic segments of hippocampal pyramidal neurons in the stratum radiatum of the CA1 area. The length (B), width (C), and density (D) of the spine protrusions, as well as the percentages of mushroom-like (E) and thin (F) spines, were quantified. Data are represented as the mean ± SEM of N = 3 mice per genotype and n = 33 (+/+) or n = 36 (BDNF<sup>met/leu</sup>) neurons per mouse. (G) Immunoblot analyses of PSD-95 and SynGAP expression levels in hippocampal lysates (25 µg protein) from +/+ and BDNF<sup>met/leu</sup> mice. The expression levels of PSD-95 and SynGAP were normalized to that of β-actin. The left panel shows a representative blot and the right panel shows quantification of the data (PSD-95, p = 0.19; and SynGAP, p = 0.73, by Student's t-tests). N = 3 mice per group. (H) The interaction of PSD-95 with SynGAP in +/+ and BDNF<sup>met/leu</sup> hippocampus. Hippocampal lysates were immunoprecipitated with an anti-PSD-95 antibody, followed by immunoblotting using anti-PSD-95 and anti-SynGAP antibodies. Note a selective decrease in SynGAP in BDNF<sup>met/leu</sup> hippocampus. (I) Immunoblot analyses of GluN2B expression in hippocampal lysates from +/+ and BDNF<sup>met/leu</sup> mice. The expression levels of GluN2B were normalized to that of β-actin. The left panel shows a representative blot and the right panel shows quantification of the data (N = 3 mice per group, p = 0.18 by Student's t-test). (J–K) The level of synaptic proteins in hippocampal synaptosomal preparations from +/+ and BDNF<sup>met/leu</sup> mice. Note a selective increase in GluN2B in BDNF<sup>met/leu</sup> hippocampus. (L) The interaction of GluN2B with PSD-95 in +/+ and BDNF<sup>met/leu</sup> hippocampi. Hippocampal lysates (2 mg protein) were immunoprecipitated (IP) with an anti-PSD-95 antibody, and equal aliquots of the

immunoprecipitants were subjected to immunoblotting (IB) with the indicated antibodies. Note that the interaction between PSD95 and GluN2B was decreased in BDNF<sup>met/leu</sup> hippocampus, compared with that in the +/+ hippocampus.

**Figure 3-figure supplement 1**

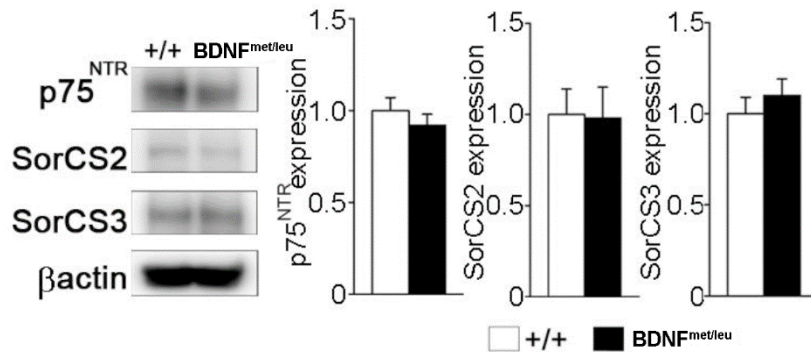

Immunoblot analyses of p75<sup>NTR</sup>, SorCS2, and SorCS3 expression in hippocampal lysates (25 μg of protein) from BDNF<sup>+/+</sup> and BDNF<sup>met/leu</sup> mice. The expression level of indicated proteins was normalized to that of beta-actin. The left panel shows a representative blot and the right panel shows quantification of the data (p75<sup>NTR</sup>, p = 0.18; SorCS2, p = 0.46; SorCS3, p = 0.77, by Student's t-test.). N = 3 mice per group.

## Figure 4

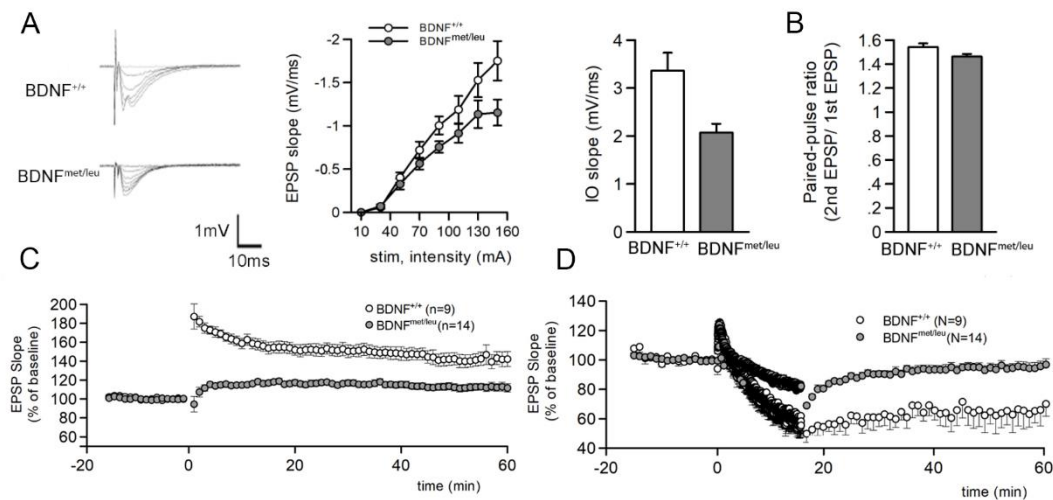

### Impairments in synaptic transmission and plasticity.

(A) A decrease in basal synaptic transmission in  $BDNF^{met/leu}$  mice. Representative traces (Left), quantitative analysis (Middle), and slope (right) of the input-output (I/O) curve of field excitatory postsynaptic potentials (fEPSPs) recorded in Schaffer collateral-CA1 pyramidal neurons in the hippocampus of  $+/+$  and  $BDNF^{met/leu}$  mice. The slopes of fEPSP were plotted against the fiber volley amplitude.  $+/+$ :  $N=4$  animals,  $n=9$  slices;  $BDNF^{met/leu}$ :  $N=4$  animals,  $n=9$  slices. (B) Normal paired-pulse facilitation (PPF) in  $BDNF^{met/leu}$  mice. Two stimuli were applied at various inter-pulse intervals (IPI, 10 to 100 msec). The ratios of the second and first fEPSP slopes were calculated, and mean values were plotted against different inter-pulse intervals (IPI, 10 to 100 msec).  $+/+$ :  $N=4$  animals,  $n=9$  slices;  $BDNF^{met/leu}$ :  $N=4$  animals,  $n=9$  slices. (C) Impairments of long-term potentiation (LTP) in  $BDNF^{met/leu}$  mice. The fEPSP slopes were plotted against time (in minutes) before and after theta-burst stimulation (TBS, 5 pulses at 100Hz per burst, 10 bursts with an interval of 200 msec).  $n$  in this and (D) indicates number of slices used. (D) Impairments of long-term depression (LTD) in  $BDNF^{met/leu}$  mice. The experiments were carried out in the same way as above except low-frequency stimulation (1Hz 900 pulse) were applied to hippocampal slices to induce LTD.

## Figure 5

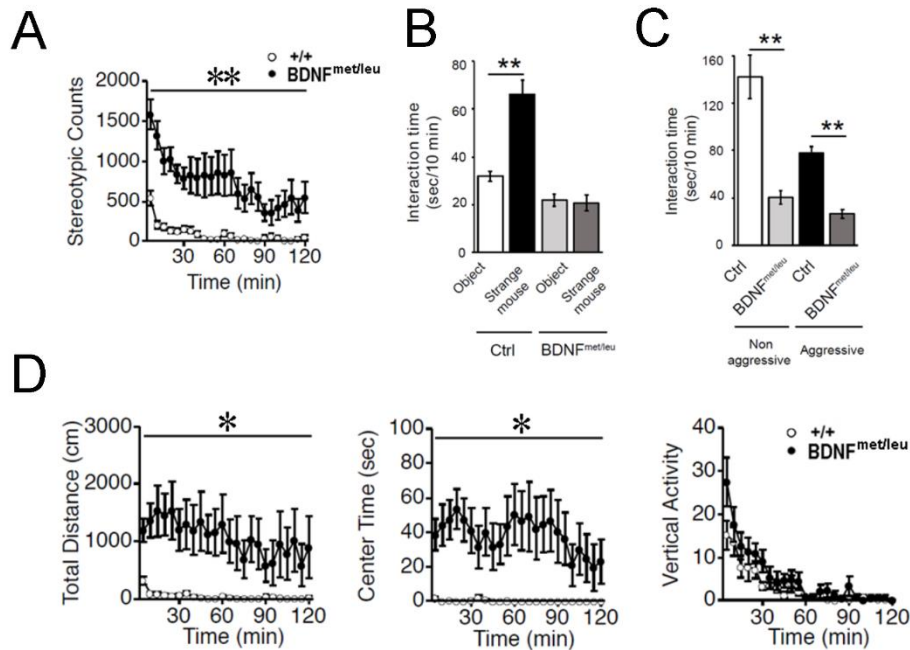

### Autism spectrum disorders (ASD)-related behavioral phenotypes.

(A) Stereotype behavior. In the same open field, the number of “star-gazing” like behaviors were counted over a 120-min period. (B) Social-interaction test in the open field. Interaction time was measured as the time mice spent in the quadrant of target object or stranger mouse within in a 10-min period. When presented both an object and a stranger mouse simultaneously, *+/+* mice spent more time in the quadrant to interact with the caged stranger mouse. However, *BDNF<sup>met/leu</sup>* mice had no preference for the stranger mouse. (C) Social interactions of freely moving *BDNF<sup>met/leu</sup>* and *+/+* littermates with aggressive or non-aggressive test mice. A mouse generally interacts less with an aggressive littermate than with a non-aggressive one. In contrast, *BDNF<sup>met/leu</sup>* mice displayed a decreased time in both non-aggressive and aggressive interactions.  $N = 7$  mice per genotype.  $**P < 0.01$ . (D) *BDNF<sup>met/leu</sup>* mice exhibit severe hyperactivity. Mice were placed in a standard open field, and total distance traveled (left), the amount of time spent in the center of the open field (center), and vertical activity (right) were counted in a 120-min period.

**Figure 5-figure supplement 1**

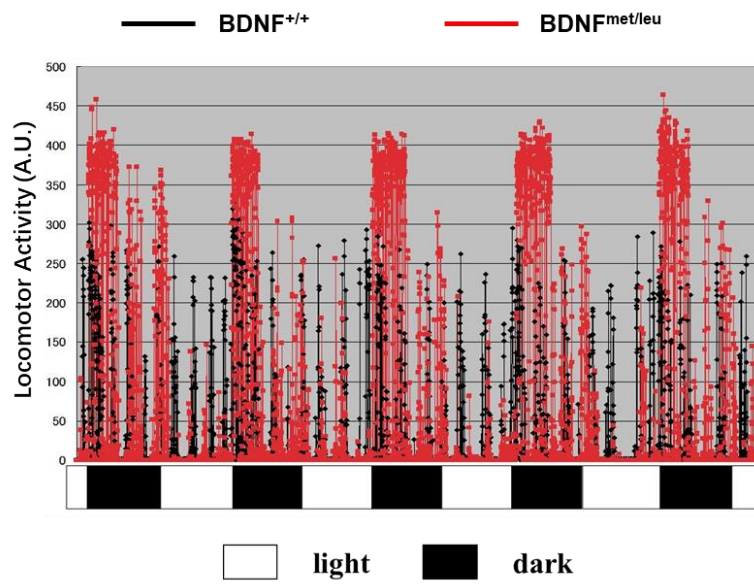

The recording of locomotor activity of BDNF<sup>+/+</sup> (N=4) and BDNF<sup>met/leu</sup> (N=4) mice during 4.5 days, with 12 h light and 12 h dark phases. Y axis indicates the horizontal activity for 5 minutes.



## Figure 6

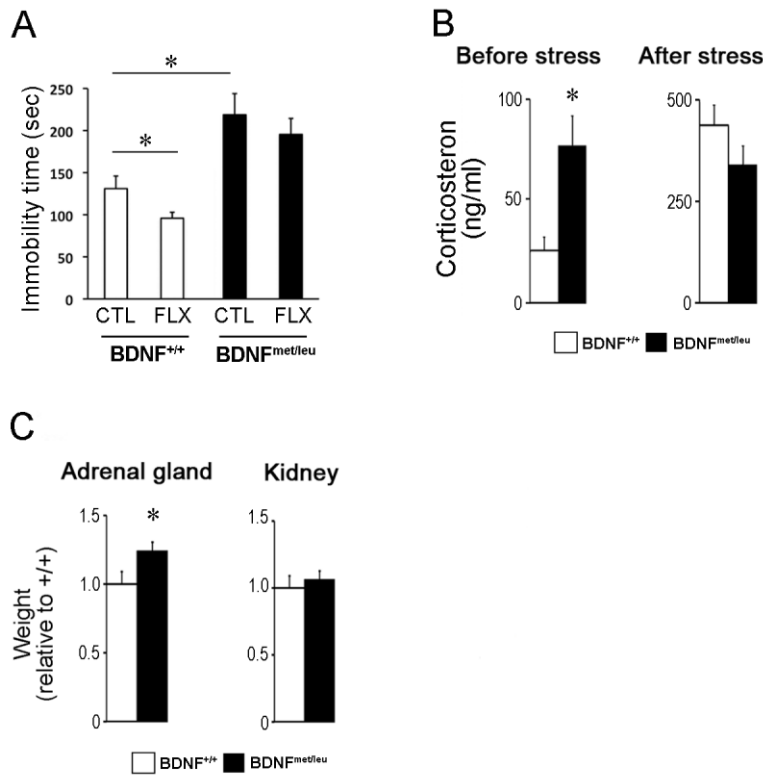

### Elevated stress response in BDNF<sup>met/leu</sup> mice.

(A) Tail suspension test of BDNF<sup>+/+</sup> and BDNF<sup>met/leu</sup> mice at the age of 10~12 weeks. Animals were administered saline or fluoxetine 30 min before the tail suspension test (10 mg/kg i.p.). \*,  $p < 0.05$ ; ANOVA with post-hoc test.  $N=7\sim 8$  littermate animals. (B) Corticosterone levels in the serum before and after acute stress exposure. The tail blood samples were collected in group-housed BDNF<sup>+/+</sup> and BDNF<sup>met/leu</sup> mice (10-week-old,  $N = 8$  per genotype) (Left panel, before stress). After an additional 2 weeks of group-housing, the animals were subjected to immobilization stress (60 min) and the tail blood samples were collected immediately (Right panel, after stress). The serum corticosterone concentration was determined immediately after sampling. (C) The relative weights of the adrenal gland and kidney in 8-week-old littermate animals ( $N = 6$  per genotype) with the indicated genotypes. The organ weights were normalized to the body weight of each animal.



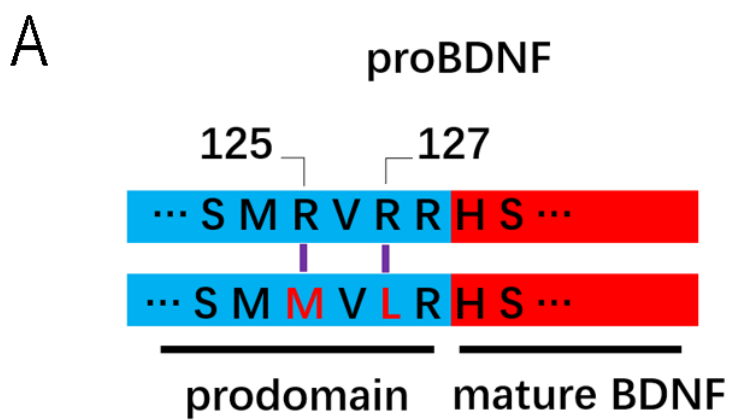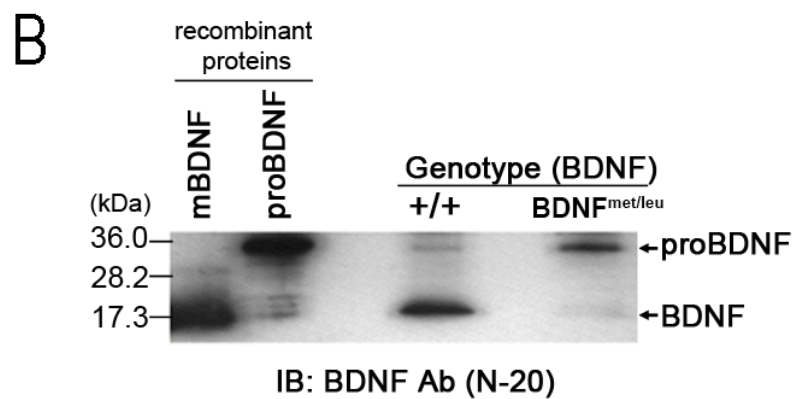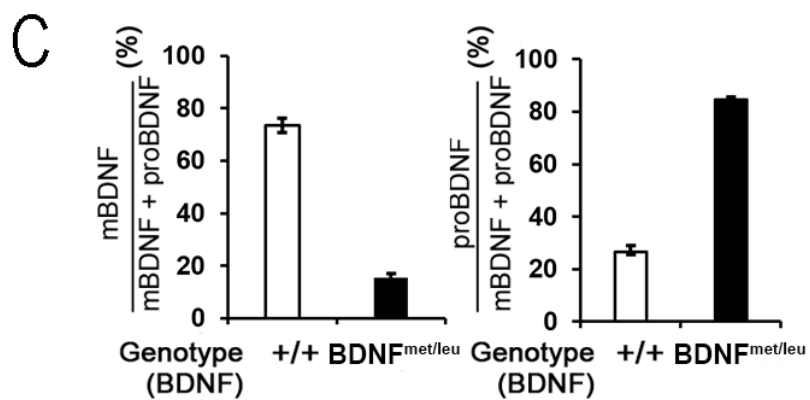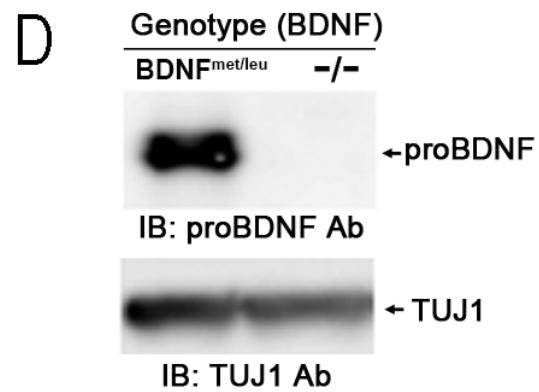

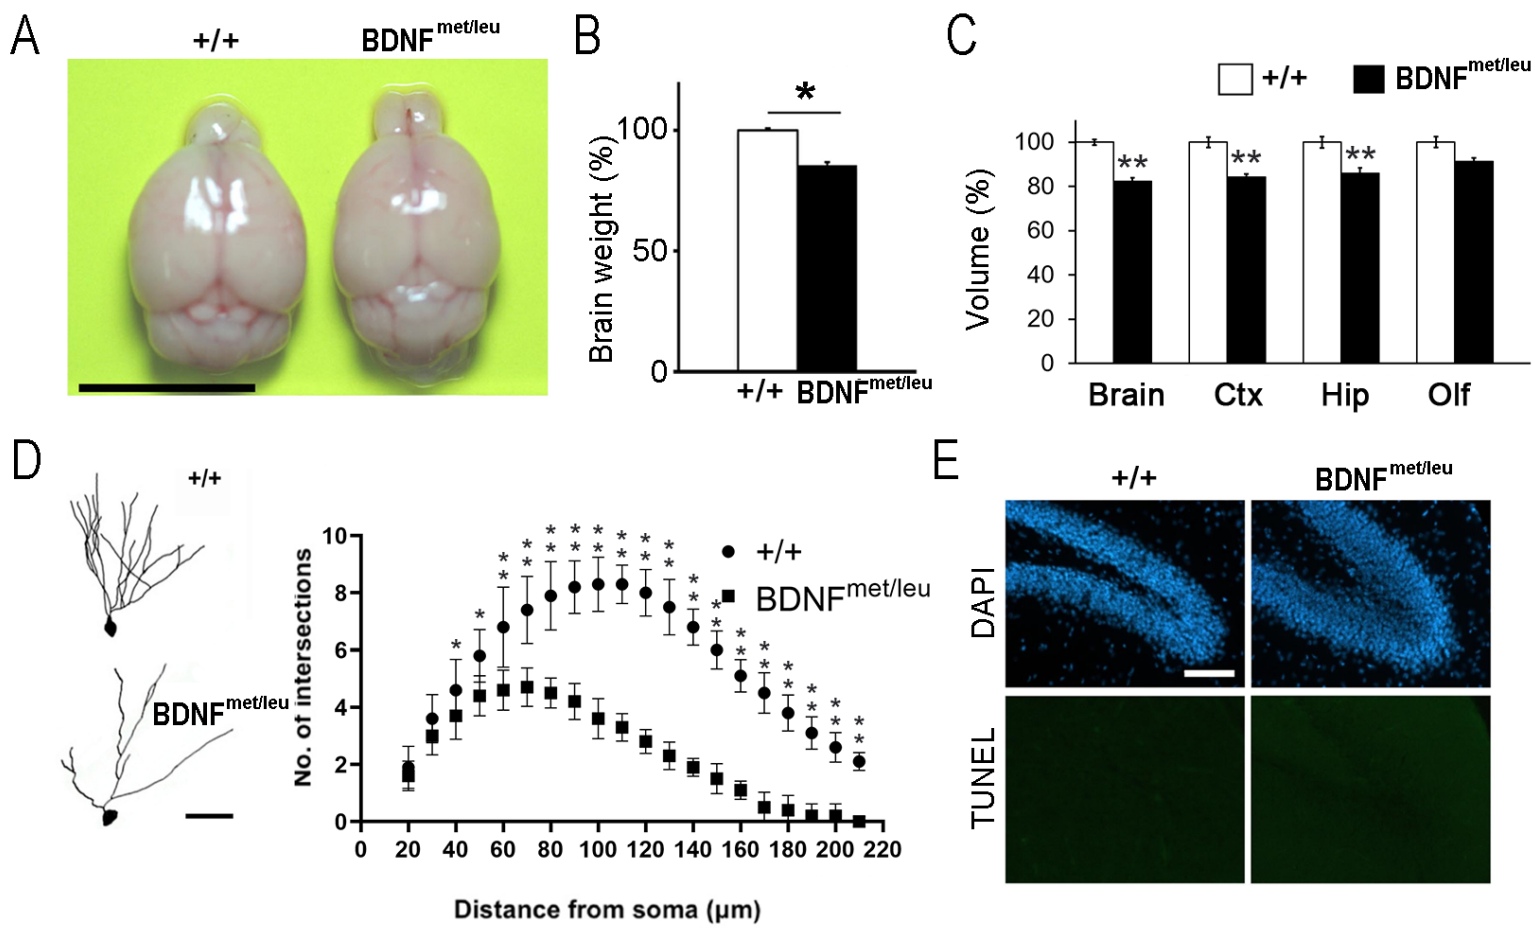

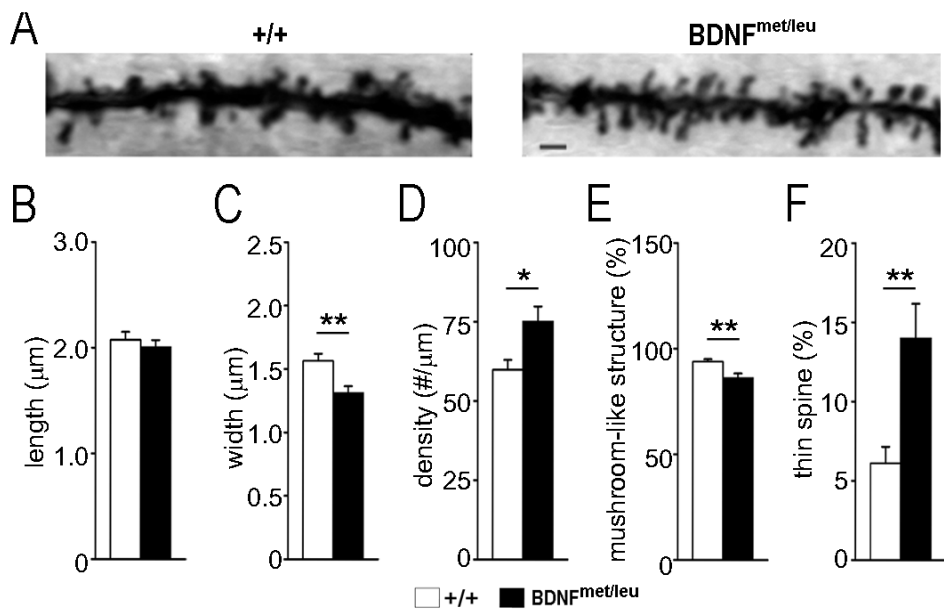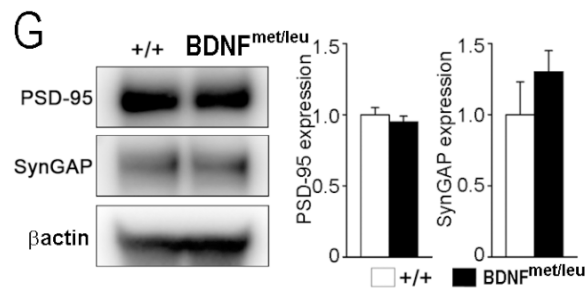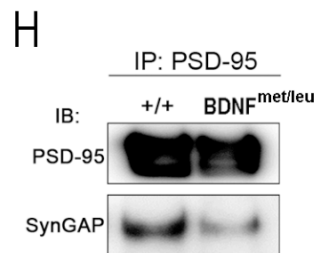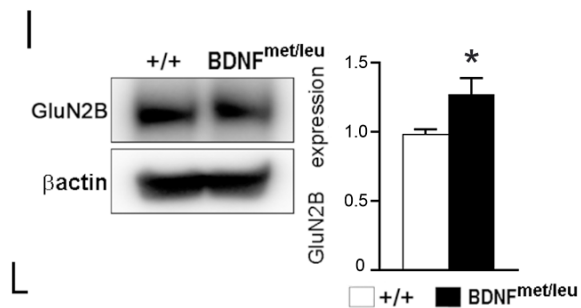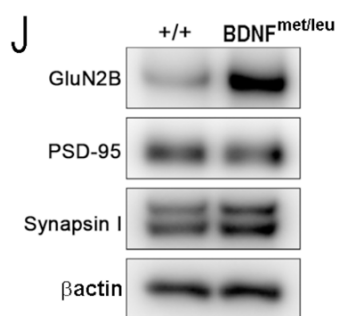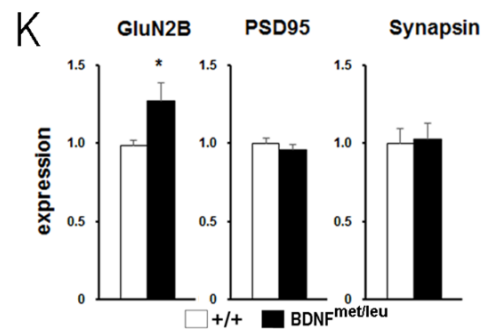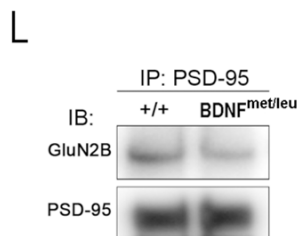



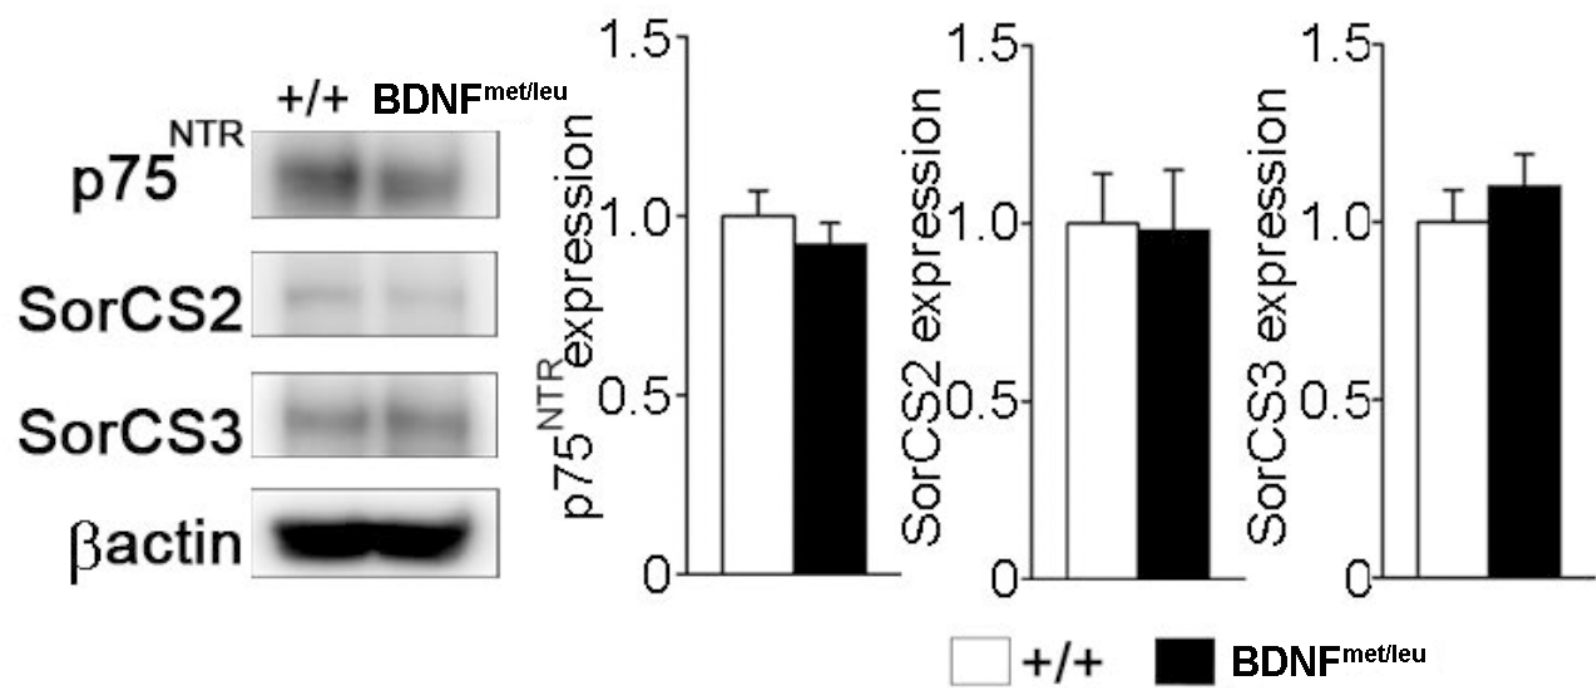

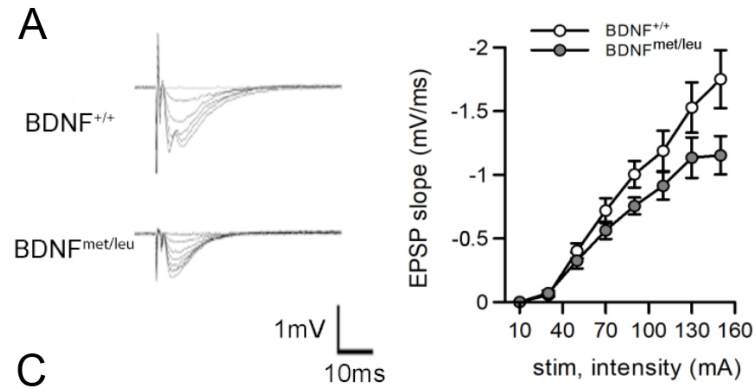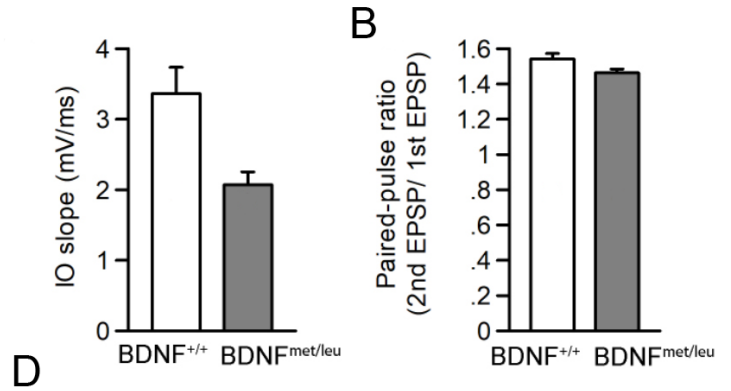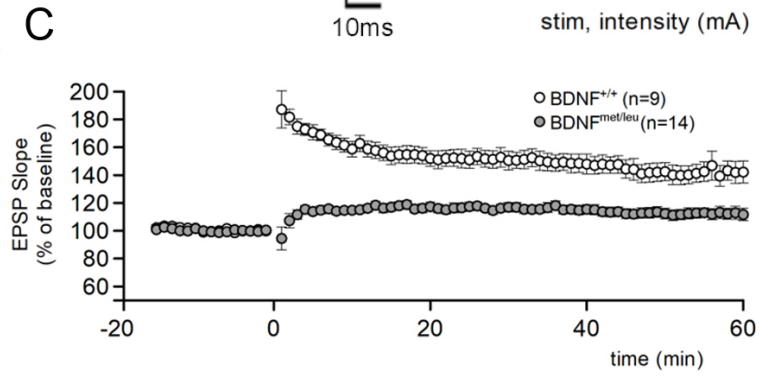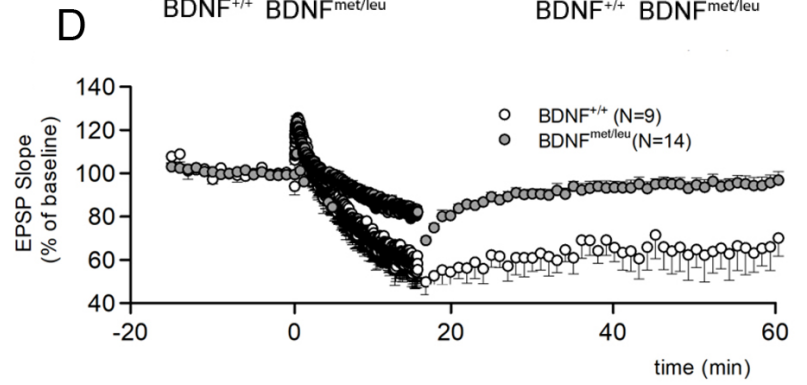

**A**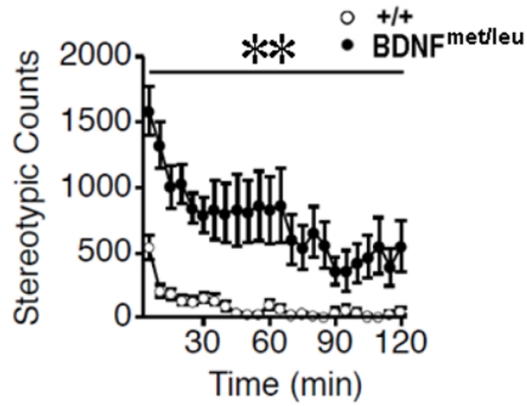**B**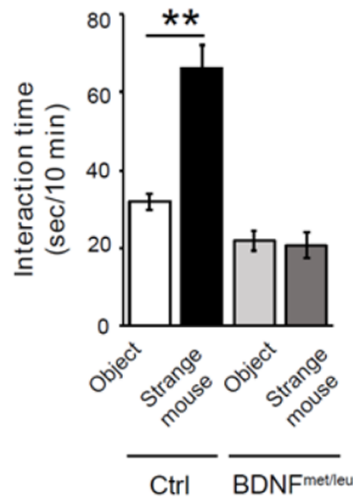**C**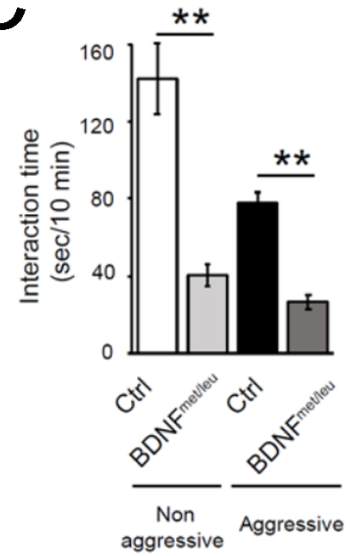**D**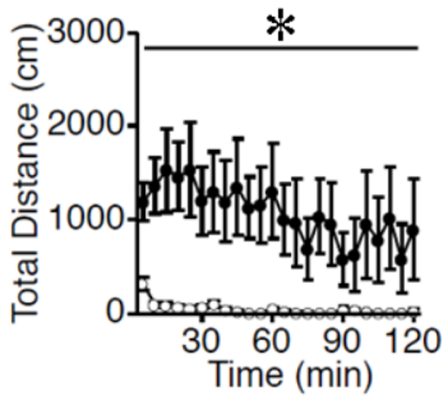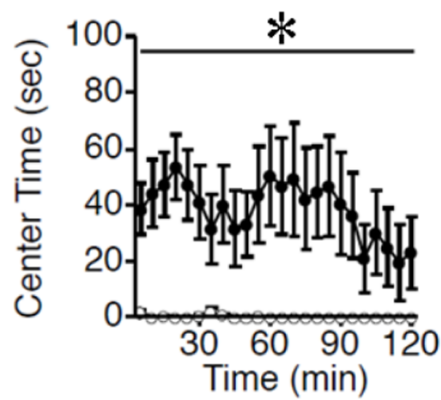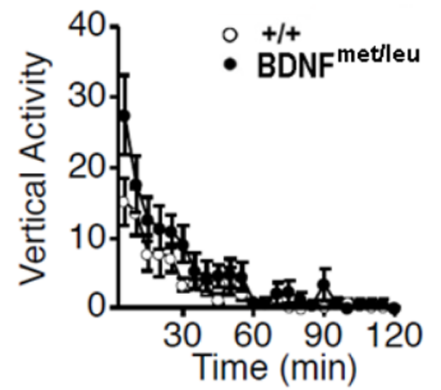

— BDNF<sup>+/+</sup>

— BDNF<sup>met/leu</sup>

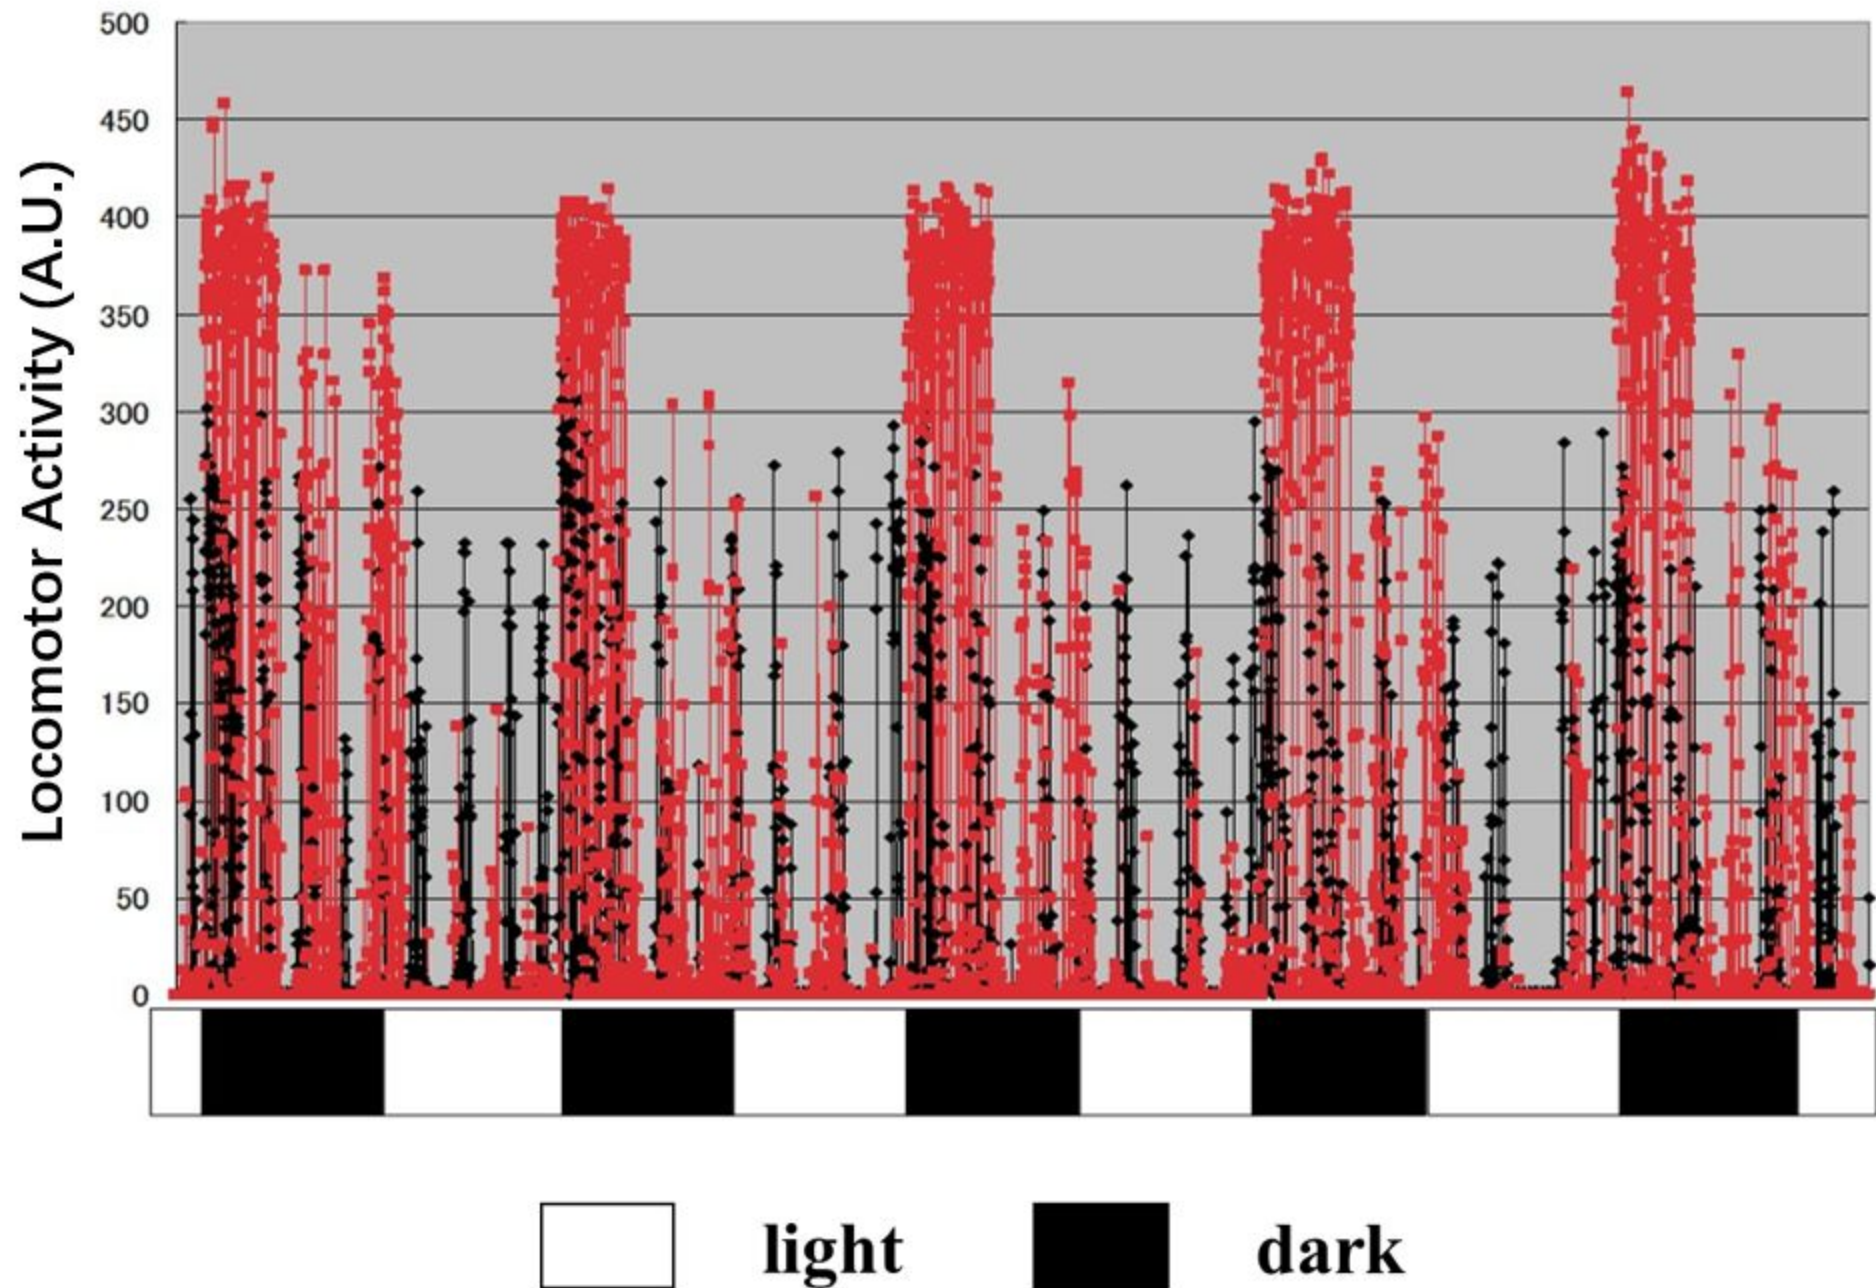

**A**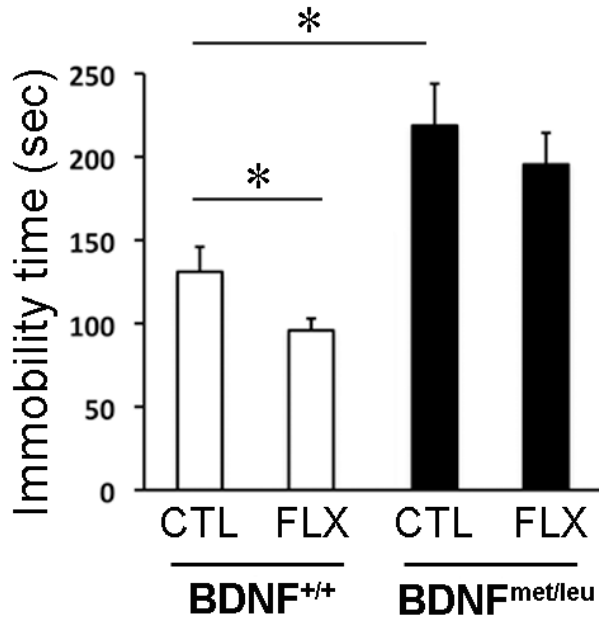**B**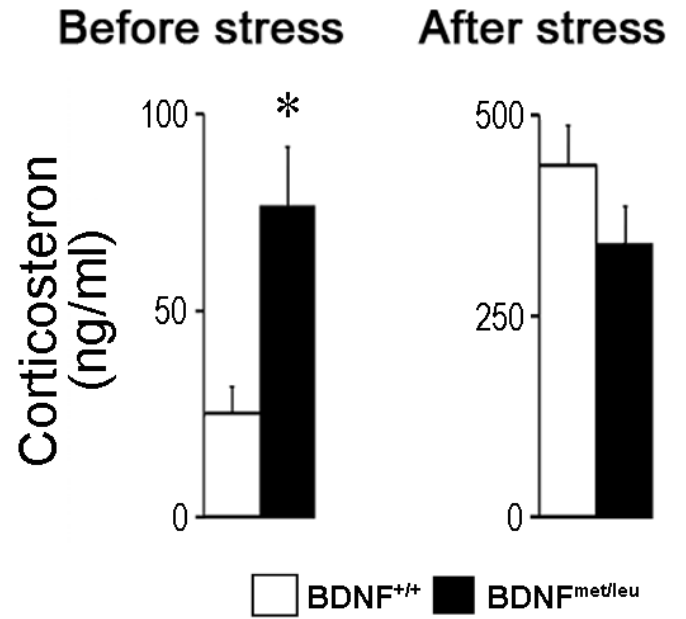**C**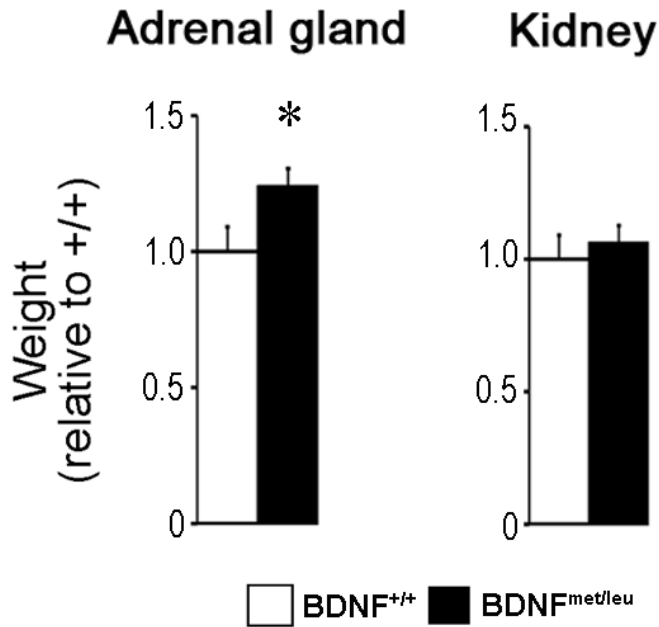



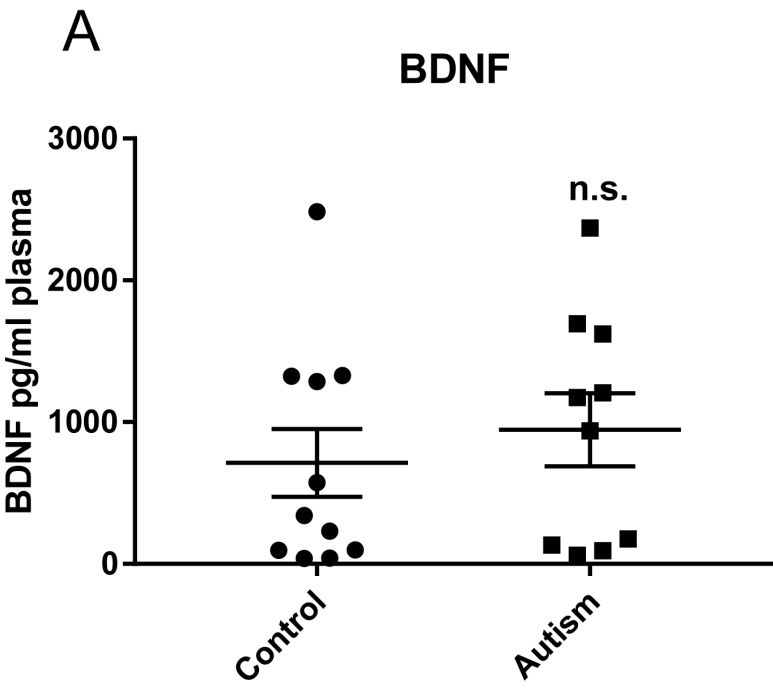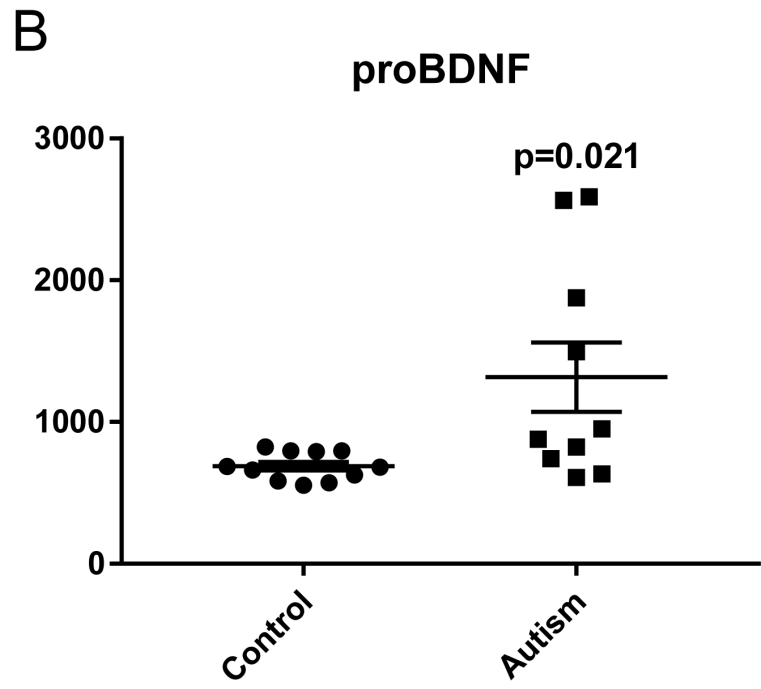

Source: https://www.biorxiv.org/content/10.1101/2020.06.12.149104v1.full.pdf
